# Supplementary material for: Conservation Study of Imprinted Genes in Maize Triparental Heterozygotic Kernels
Source: MDPI journal article supplement (doi:10.3390/ijms232315424), 2022-12-06
Supplement: s1 [file s1]

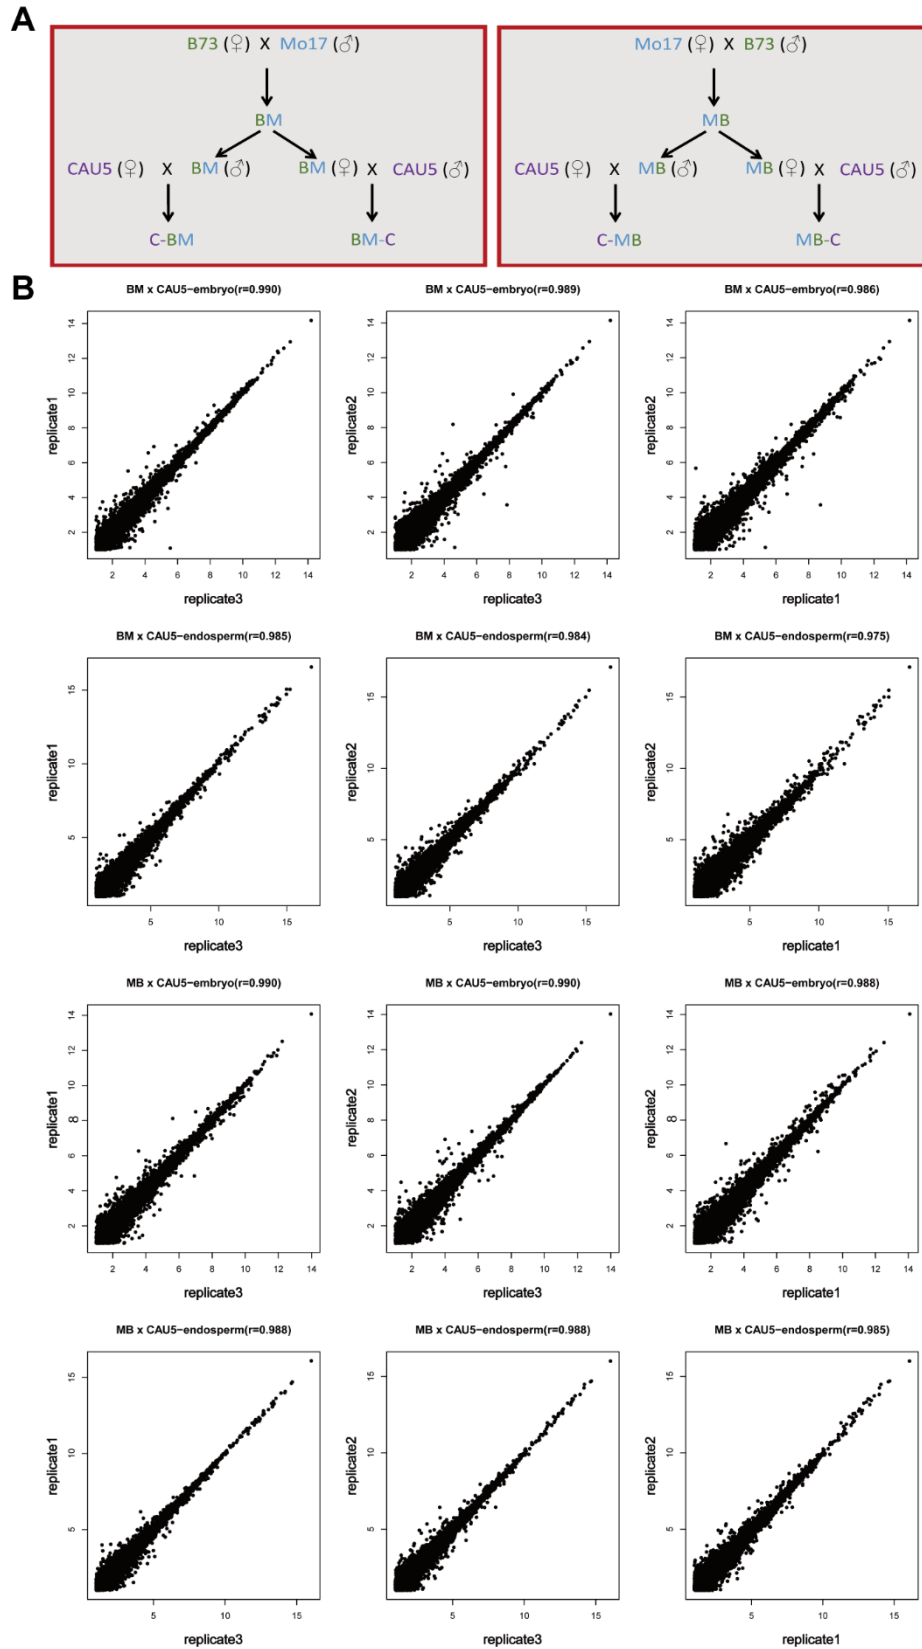

**Supplemental Figure S1** The cross progress for BM-C/C-BM and MB-C/C-MB (A) and the correlation among replicates of embryo and endosperm samples from BM-C/C-BM and MB-C/C-MB (B).

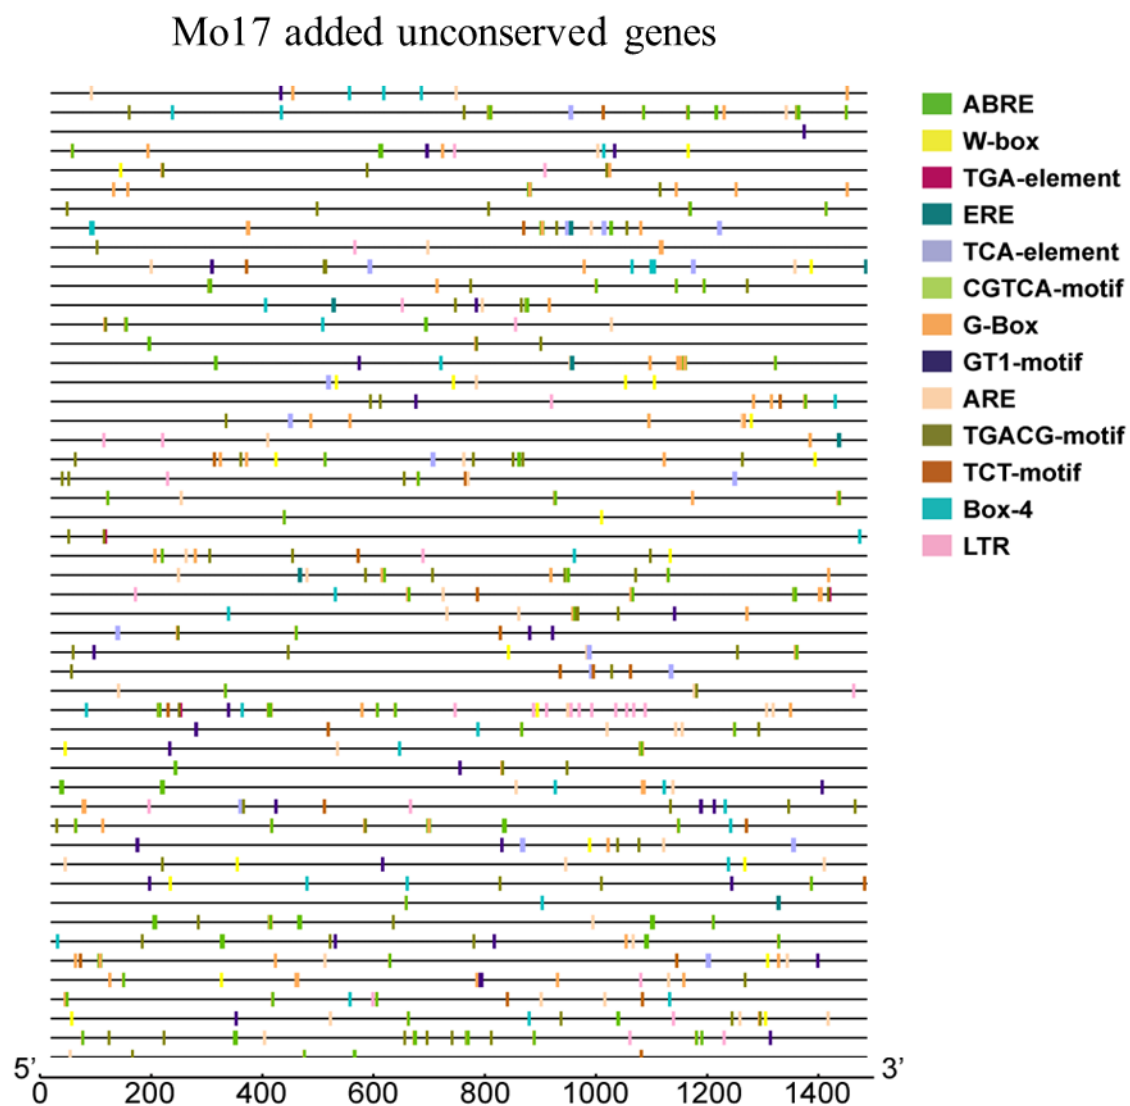

**Supplemental Figure S2** The cis-element distribution in the promoter sequence of the 51 non-conserved imprinted genes detected in the Mo17-added group

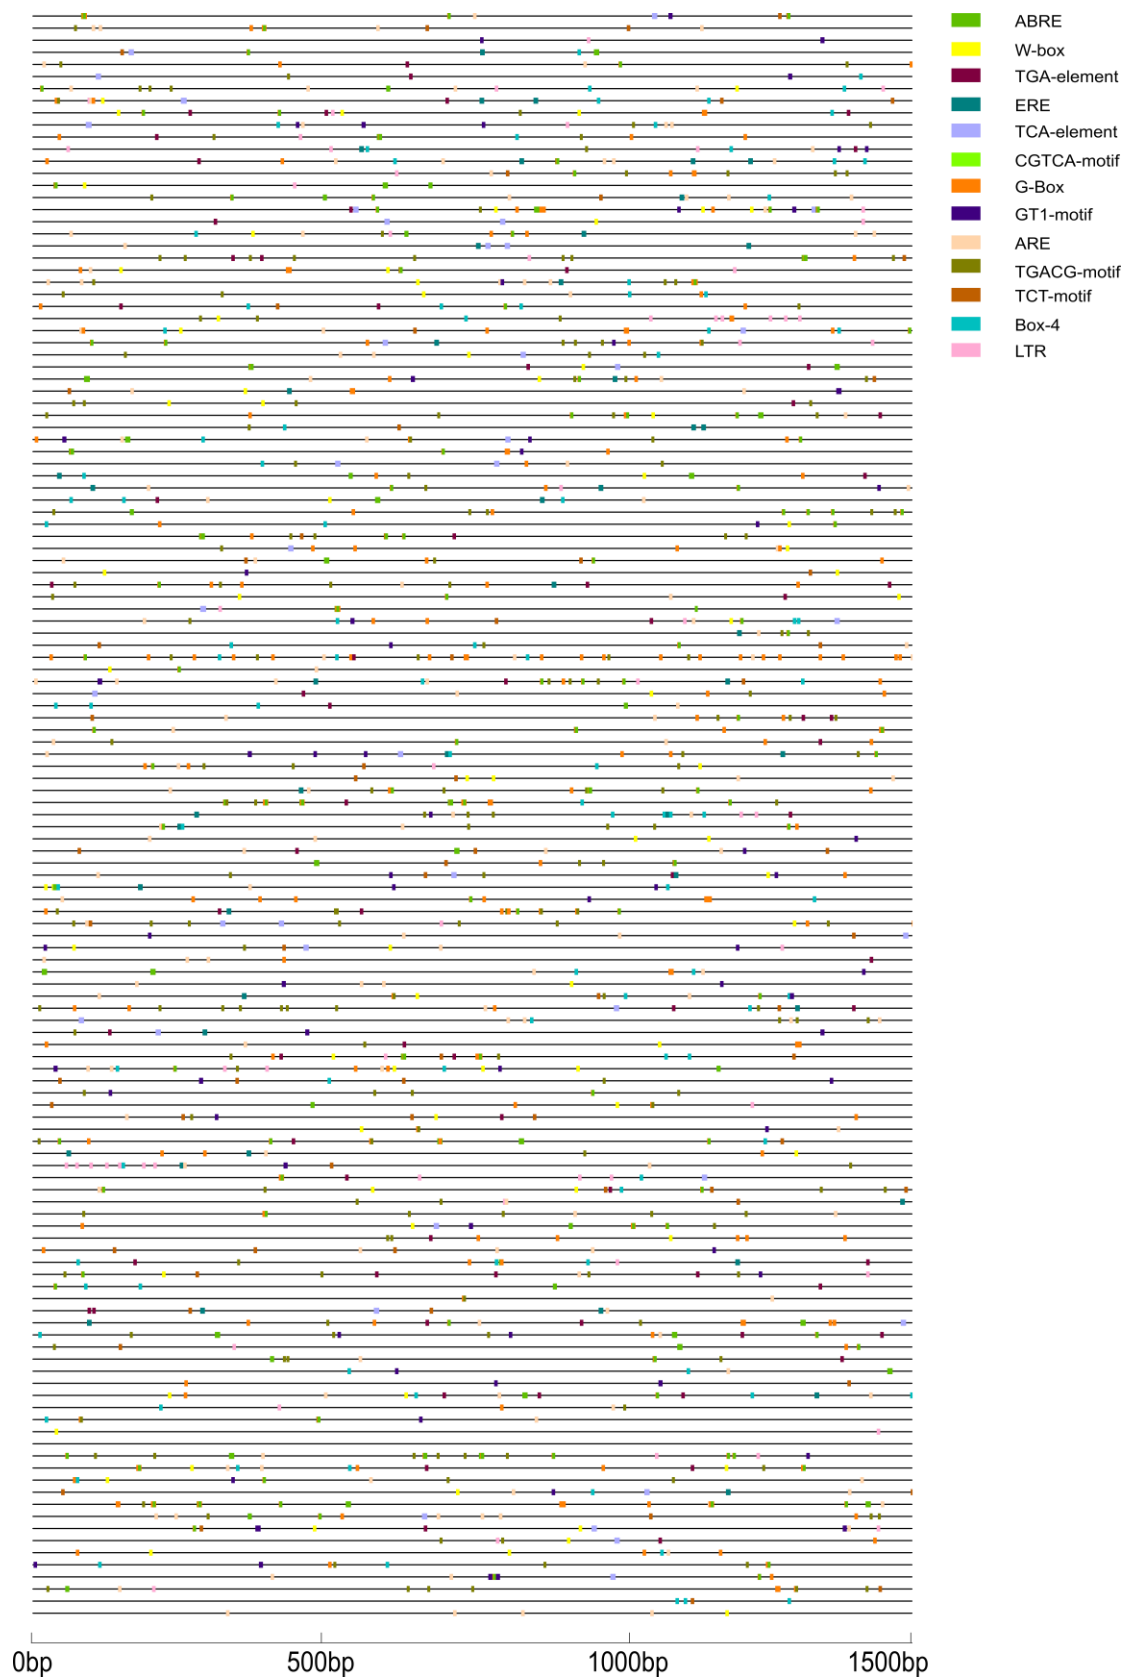

**Supplemental Figure S3** The cis-element distribution in the promoter sequence of the conserved imprinted genes detected in the B73-added group

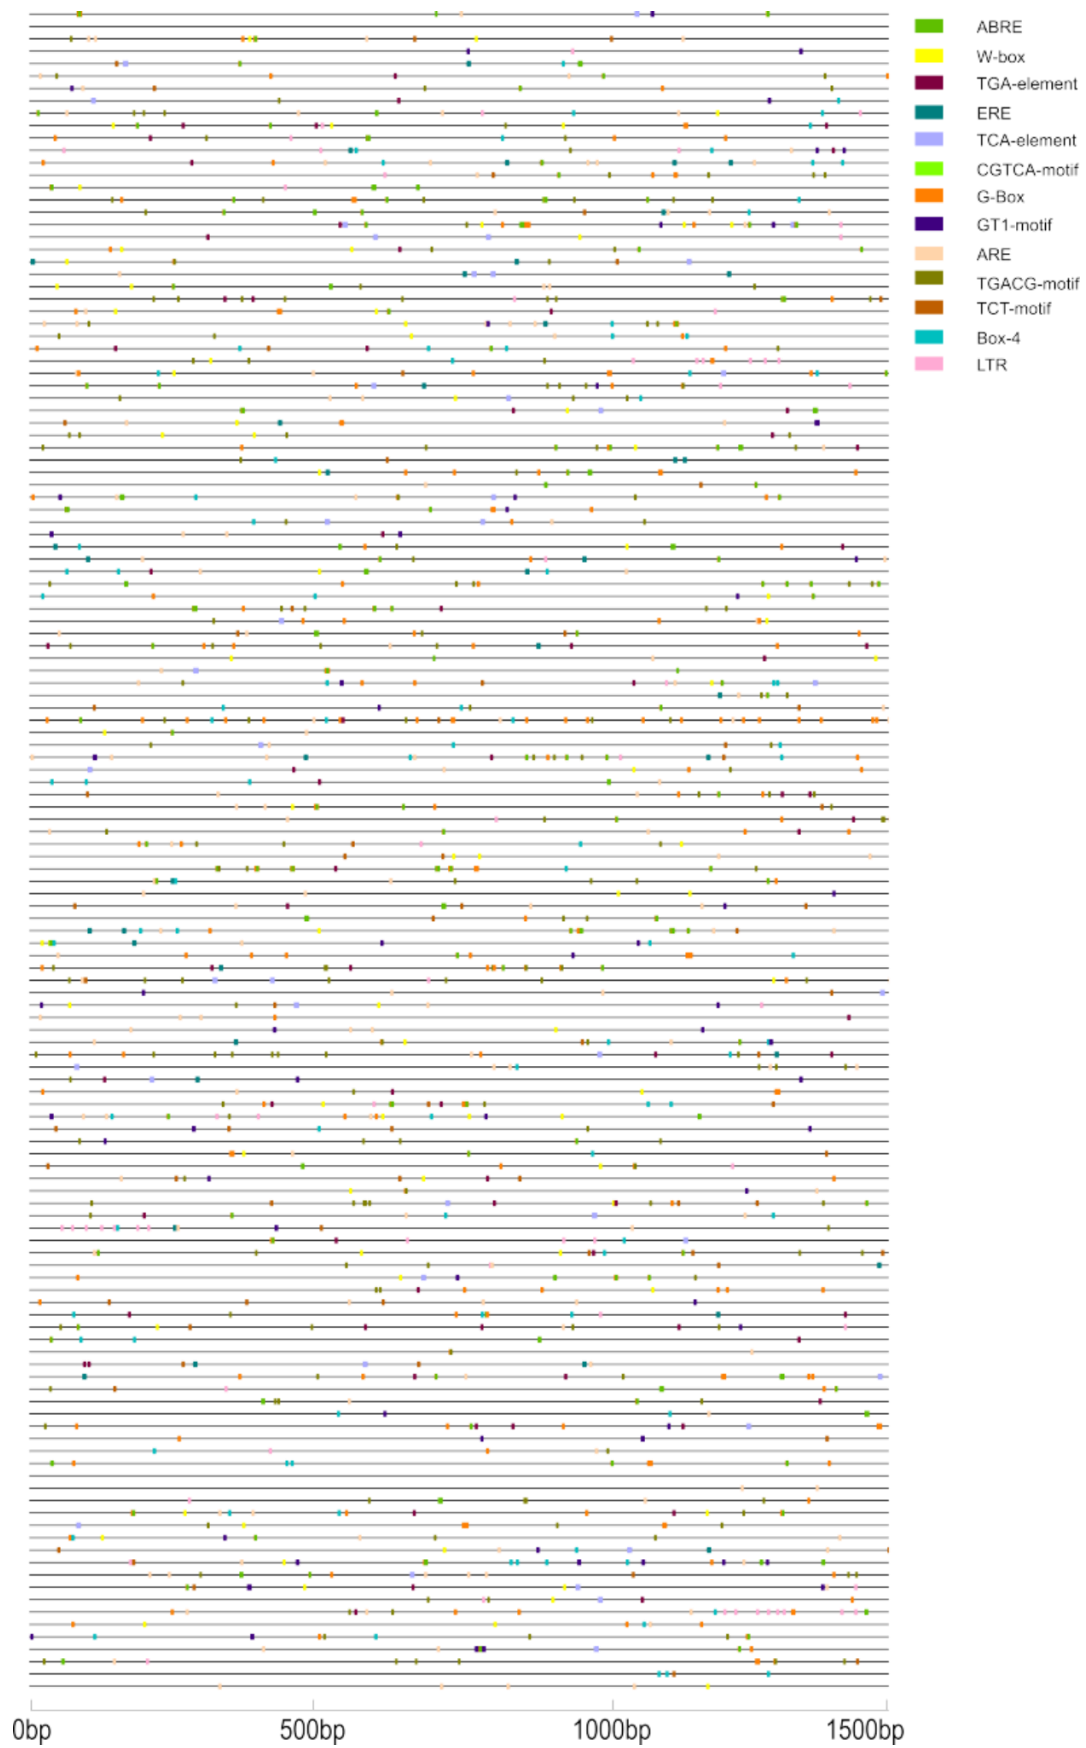

**Supplemental Figure S4.** The cis-element distribution in the promoter sequence of the conserved imprinted genes detected in the Mo17-added group

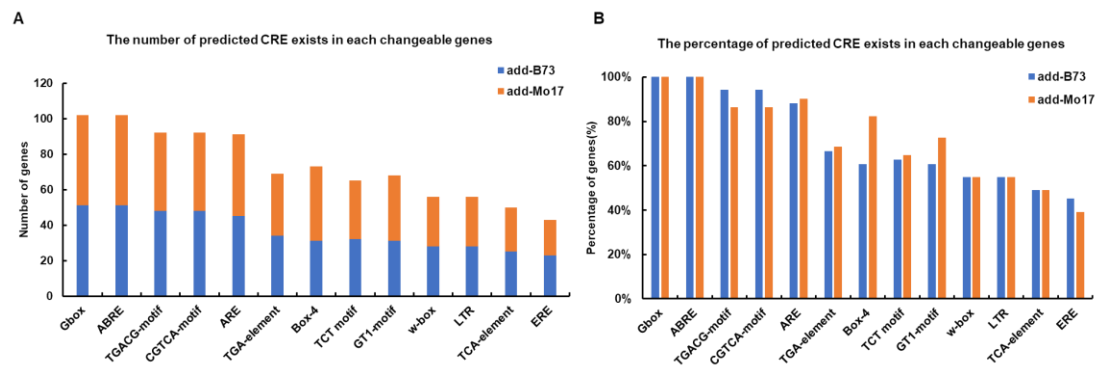

**Supplemental Figure S5.** Distribution of predicted CREs in each non-conserved gene

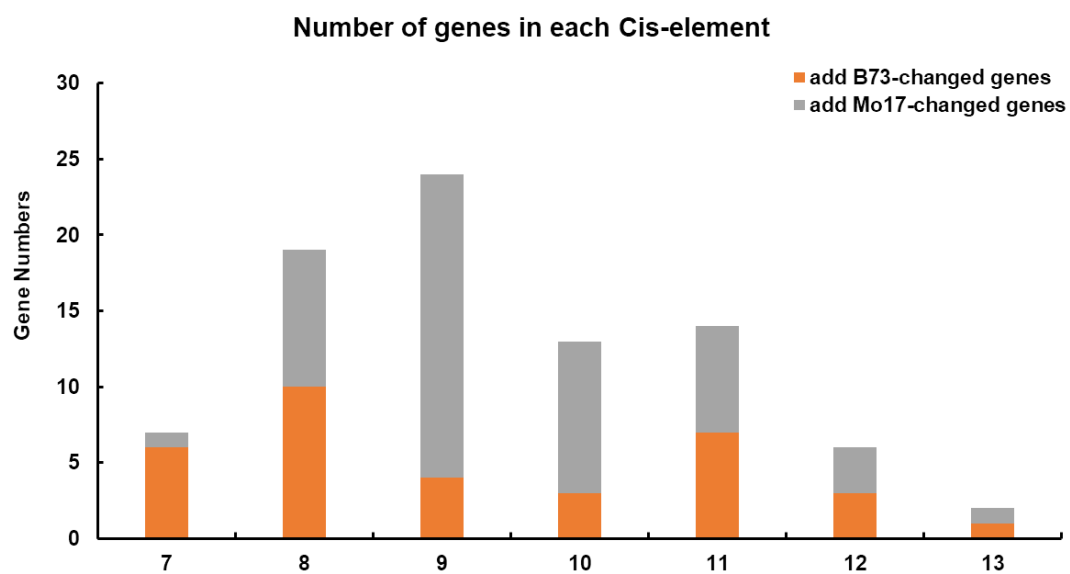

**Supplemental Figure S6.** The ratio of each Cis-element existed in two groups of non-conserved genes

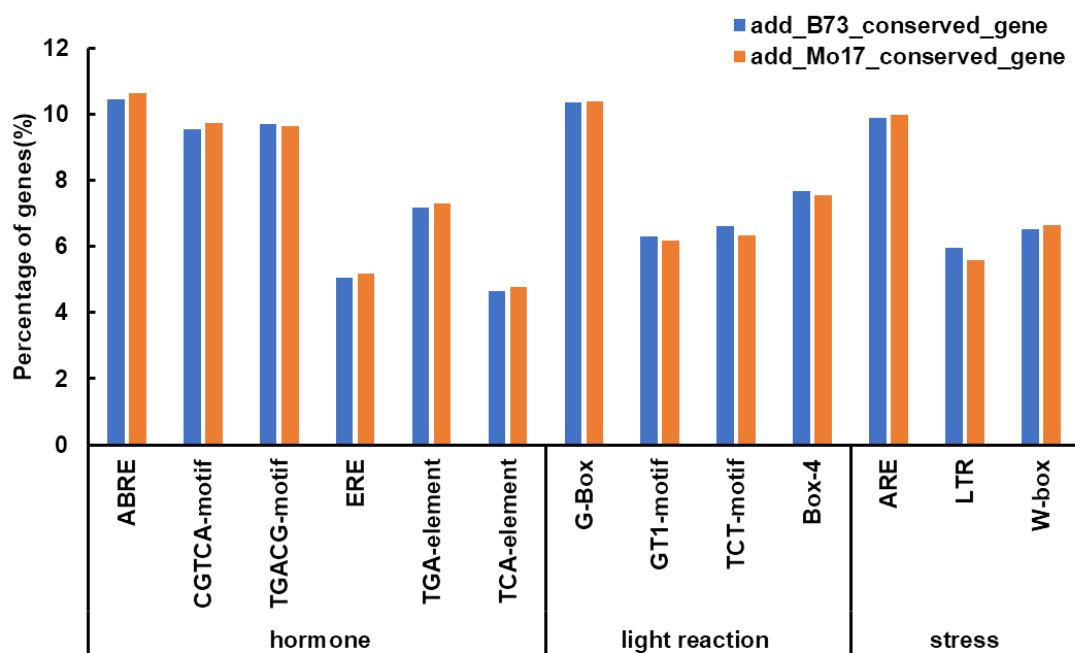

**Supplemental Figure S7.** The ratio of each Cis-element existed in two groups of conserved genes

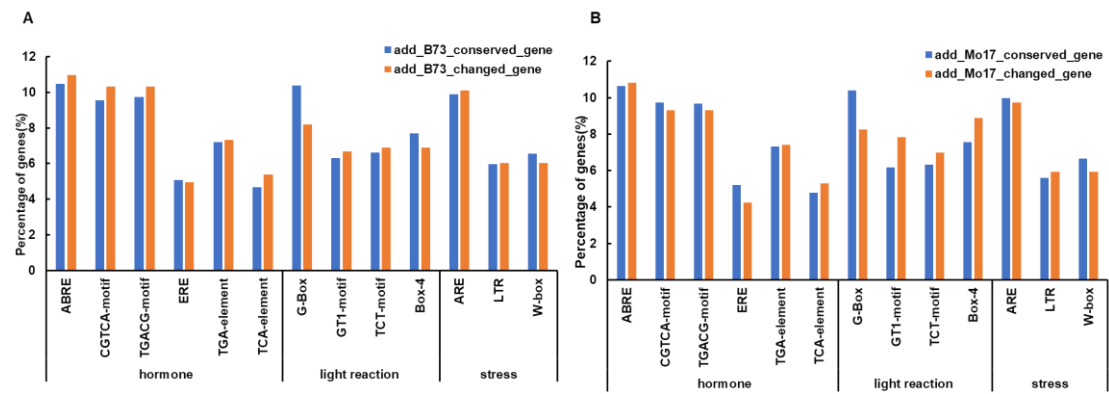

**Supplemental Figure S8.** Ratio comparison of each cis-element in the conserved and non-conserved genes in the B73-added and Mo17-added groups



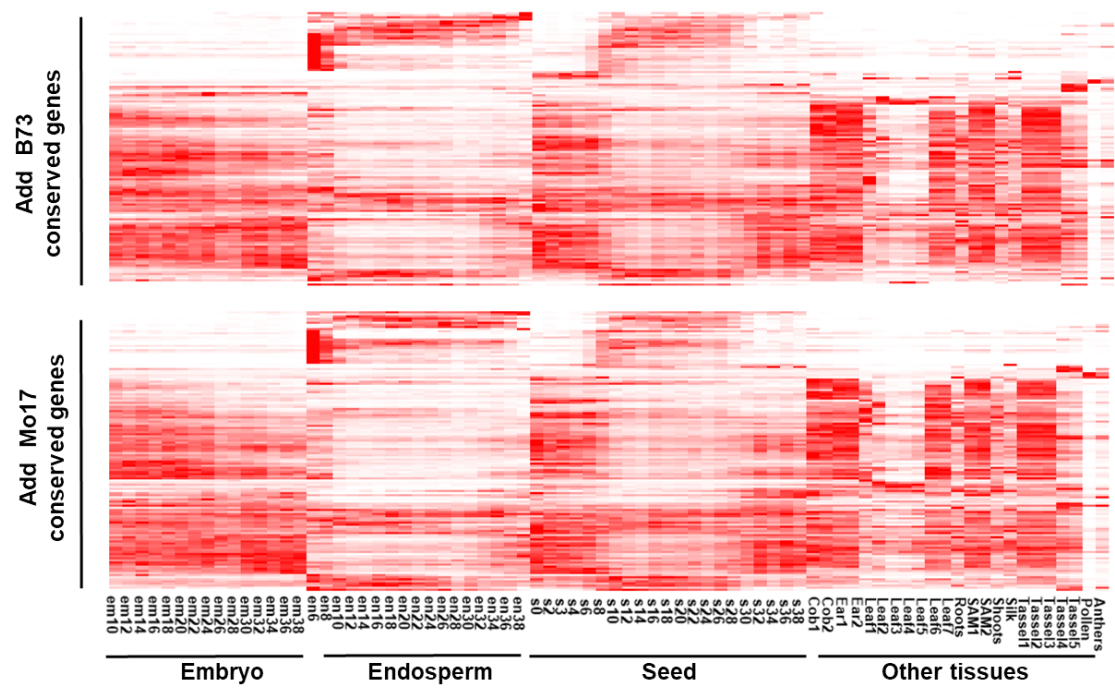

**Supplemental Figure S9.** The expression of conserved imprinted genes detected in the B73-added and Mo17-added groups

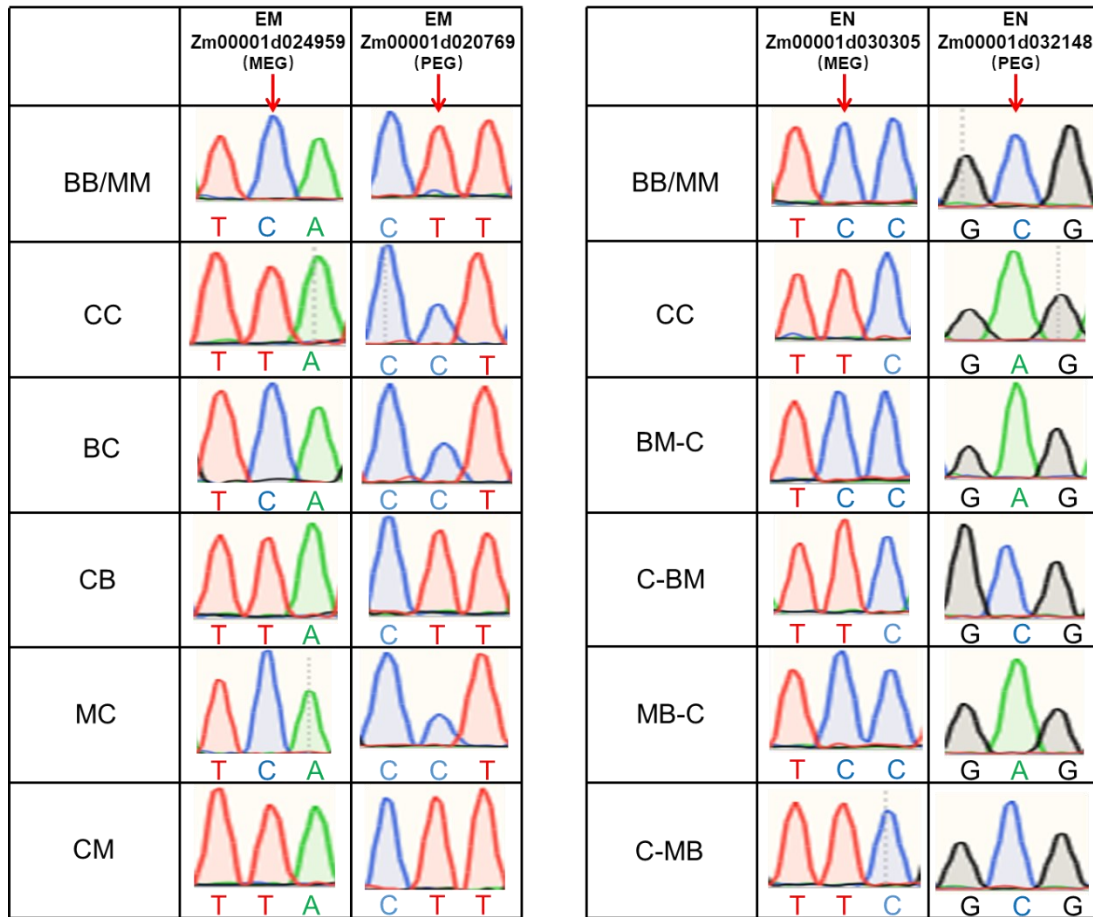

**Supplemental Figure S10.** Verification of the imprinted genes by PCR sequencing
