# Supplementary material for: Conservation Study of Imprinted Genes in Maize Triparental Heterozygotic Kernels
Source: Int J Mol Sci. 2022 Dec 6;23(23):15424. doi: 10.3390/ijms232315424 (PMC9735609; doi:10.3390/ijms232315424)
Supplement: Supplementary file 1 [file ijms-23-15424-s001.zip › Supplemental Tables.xlsx]

## Sheet: Supplemental Table S1
Supplemental Table S1. Data quality and data size used in our study.
Sample	Raw Base(G)	Clean Base(G)	Q20(%)	Q30(%)	GC Content(%)
BM X CAU5-embryo (rep1)	4.45	4.37	97.53	92.96	55.61
BM X CAU5-embryo (rep2)	3.7	3.64	97.59	93.03	55.39
BM X CAU5-embryo (rep3)	4.5	4.43	97.6	93.09	55.36
BMX CAU5-endosperm (rep1)	5.17	5.08	97.99	94.09	53.66
BMX CAU5-endosperm (rep2)	5.37	5.33	98.1	94.36	54.17
BMX CAU5-endosperm (rep3)	4.37	4.33	97.99	94.06	53.8
MB X CAU5-embryo (rep1)	4.09	4.05	98.02	94.27	54.75
MB X CAU5-embryo (rep2)	4.01	3.98	98.19	94.68	54.51
MB X CAU5-embryo (rep3)	5.03	4.99	97.88	93.91	54.16
MB X CAU5-endosperm (rep1)	3.94	3.9	98.13	94.41	53.5
MB X CAU5-endosperm (rep2)	5.07	5.02	98.04	94.2	52.91
MB X CAU5-endosperm (rep3)	3.88	3.85	98.08	94.3	53.19
CAU5 X BM-embryo (rep1)	4.49	4.37	98.07	94.42	54.07
CAU5 X BM-embryo (rep2)	4.39	4.34	97.53	92.88	54.67
CAU5 X BM-embryo (rep3)	3.69	3.65	97.64	93.17	54.57
CAU5 X BM-endosperm (rep1)	4.39	4.32	97.42	92.61	53.9
CAU5 X BM-endosperm (rep2)	3.26	3.22	97.3	92.38	53.75
CAU5 X BM-endosperm (rep3)	4.35	4.3	97.06	91.84	53.91
CAU5 X MB-embryo (rep1)	3.29	3.24	97.36	92.57	55.31
CAU5 X MB-embryo (rep2)	4.26	4.19	97.5	92.85	55.76
CAU5 X MB-embryo (rep3)	4.18	4.12	97.52	92.84	55.27
CAU5 X MB-endosperm (rep1)	3.43	3.38	97.47	92.64	54.26
CAU5 X MB-endosperm (rep2)	3.38	3.34	97.12	91.97	53.84
CAU5 X MB-endosperm (rep3)	4.12	4.05	97.36	92.48	53.64

## Sheet: Supplemental Table S2
Supplemental Table S2. List of imprinted genes detected in maize embryos and endosperm.
Gene ID	Imprinting type	Chromosome	Start	End	Best hit in rice	Type in rice	Best hit in sorghum	Type in sorghum	Best hit in Arabidopsis	Type in Arabidopsis
Zm00001d027463	em-MEG	chr1	5883718	5886868	LOC_Os03g03570.2|13103.m00347|protein	NO	001G522300.1.p	NO	AT1G12460	NO
Zm00001d029281	em-MEG	chr1	64728727	64735149	LOC_Os03g25390.1|13103.m02993|protein	NO	001G360200.1.p	NO	AT3G17440	NO
Zm00001d029550	em-MEG	chr1	75797114	75806603	LOC_Os03g31180.1|13103.m03562|protein	NO	001G333900.1.p	NO	AT5G07920	NO
Zm00001d030612	em-MEG	chr1	148420982	148425811	LOC_Os12g07190.1|13112.m00750|protein	NO	008G052900.1.p	NO	AT3G52950	NO
Zm00001d031502	em-MEG	chr1	192122013	192126968	LOC_Os08g41010.3|13108.m04394|protein	NO	007G205000.4.p	NO	AT1G67325	NO
Zm00001d032454	em-MEG	chr1	227220061	227226179	LOC_Os01g60680.1|13101.m06458|protein	NO	010G097600.1.p	NO	AT3G06080	NO
Zm00001d034439	em-MEG	chr1	292992897	292996196	LOC_Os03g58190.1|13103.m06393|protein	NO	001G057400.1.p	NO	AT5G20030	NO
Zm00001d004401	em-MEG	chr2	109327004	109328229	LOC_Os08g13440.2|13108.m01437|protein	NO	006G018100.1.p	NO	AT3G05950	NO
Zm00001d005370	em-MEG	chr2	171125479	171128890	LOC_Os03g46750.1|13103.m05034|protein	NO	002G131400.1.p	NO	AT5G22130	NO
Zm00001d005920	em-MEG	chr2	192762349	192766625	LOC_Os09g28910.2|13109.m02856|protein	NO	002G230100.4.p	NO	AT4G33580	NO
Zm00001d007652	em-MEG	chr2	236954507	236959237	LOC_Os08g41710.1|13108.m04482|protein	PEG	005G198400.1.p	NO	AT3G07220	NO
Zm00001d042094	em-MEG	chr3	150550308	150552046	LOC_Os01g72190.1|13101.m07863|protein	NO	003G426700.1.p	NO	AT5G04020	NO
Zm00001d044129	em-MEG	chr3	219979958	219989574	LOC_Os01g44220.6|13101.m04580|protein	NO	003G230500.3.p	NO	AT1G27680	NO
Zm00001d048809	em-MEG	chr4	5874886	5875686	LOC_Os04g22590.1|13104.m02095|protein	NO	005G189000.1.p	NO	AT1G36180	NO
Zm00001d048847	em-MEG	chr4	6292792	6293595	NO	NO	005G184800.1.p	NO	NO	NO
Zm00001d048848	em-MEG	chr4	6333303	6334007	NO	NO	005G184800.1.p	NO	NO	NO
Zm00001d049243	em-MEG	chr4	22579361	22580152	LOC_Os04g22590.1|13104.m02095|protein	NO	005G189000.1.p	NO	AT1G36180	NO
Zm00001d049813	em-MEG	chr4	45806872	45809089	LOC_Os08g41780.1|13108.m04489|protein	NO	007G194800.4.p	MEG	AT5G14180	NO
Zm00001d052697	em-MEG	chr4	197821516	197840855	LOC_Os08g42640.1|13108.m04607|protein	NO	007G187200.2.p	NO	AT3G05545	NO
Zm00001d013369	em-MEG	chr5	9966075	9968201	LOC_Os08g40830.2|13108.m04371|protein	NO	007G202000.2.p	NO	AT4G30130	NO
Zm00001d013572	em-MEG	chr5	14483284	14513180	LOC_Os10g17960.1|13110.m01476|protein	NO	001G141800.1.p	NO	AT4G23180	NO
Zm00001d013589	em-MEG	chr5	14974916	14979586	LOC_Os03g46340.1|13103.m04986|protein	NO	001G143500.1.p	NO	AT2G30880	NO
Zm00001d013597	em-MEG	chr5	15095907	15104883	LOC_Os03g46190.2|13103.m04970|protein	NO	001G144600.1.p	NO	AT3G22590	NO
Zm00001d013612	em-MEG	chr5	15364275	15368222	LOC_Os03g45920.1|13103.m04936|protein	NO	001G146000.1.p	NO	AT5G23860	NO
Zm00001d014852	em-MEG	chr5	65588997	65591442	LOC_Os09g15480.1|13109.m01466|protein	NO	010G275100.1.p	NO	AT4G38260	NO
Zm00001d015557	em-MEG	chr5	97437119	97444093	LOC_Os02g09130.1|13102.m01000|protein	NO	004G068100.2.p	NO	AT5G20350	NO
Zm00001d015963	em-MEG	chr5	134455335	134457795	LOC_Os10g11354.1|13110.m01034|protein	NO	004G129900.1.p	NO	AT5G52450	NO
Zm00001d016394	em-MEG	chr5	160678198	160679517	LOC_Os02g19200.1|13102.m02147|protein	NO	004G090300.1.p	NO	AT5G61180	NO
Zm00001d016738	em-MEG	chr5	174732801	174733343	LOC_Os02g33380.1|13102.m03618|protein	NO	004G167900.1.p	NO	AT3G36659	NO
Zm00001d016858	em-MEG	chr5	178455640	178465092	LOC_Os02g35480.1|13102.m03856|protein	NO	004G181900.1.p	NO	AT3G59910	NO
Zm00001d017145	em-MEG	chr5	186842727	186847322	LOC_Os02g39400.1|13102.m04357|protein	NO	004G208000.1.p	NO	AT2G22570	NO
Zm00001d017291	em-MEG	chr5	191981265	191985412	LOC_Os02g41890.1|13102.m04629|protein	NO	004G222100.1.p	NO	AT2G02220	NO
Zm00001d017990	em-MEG	chr5	211550053	211550820	LOC_Os02g50700.1|13102.m05753|protein	NO	004G243300.1.p	NO	AT3G15280	NO
Zm00001d039036	em-MEG	chr6	168999800	169005010	LOC_Os05g49130.2|13105.m05250|protein	NO	009G234200.1.p	NO	AT5G46420	NO
Zm00001d018884	em-MEG	chr7	8344609	8353437	LOC_Os03g57790.1|13103.m06338|protein	NO	002G045300.1.p	NO	AT2G02760	NO
Zm00001d019036	em-MEG	chr7	13729726	13737584	LOC_Os02g04840.1|13102.m00516|protein	NO	004G037900.2.p	NO	AT4G16130	NO
Zm00001d012475	em-MEG	chr8	175178145	175184442	LOC_Os01g61210.1|13101.m06514|protein	NO	003G342000.3.p	NO	AT2G40330	NO
Zm00001d045264	em-MEG	chr9	17435761	17437686	LOC_Os06g06520.1|13106.m00673|protein	NO	010G047300.1.p	NO	AT4G01130	NO
Zm00001d046642	em-MEG	chr9	100126399	100131680	LOC_Os06g43044.1|13106.m04505|protein	NO	010G200900.1.p	NO	AT4G26790	NO
Zm00001d047834	em-MEG	chr9	142795903	142800053	LOC_Os03g16120.1|13103.m01908|protein	NO	001G424800.1.p	NO	AT5G59210	NO
Zm00001d024617	em-MEG	chr10	80385879	80387306	LOC_Os11g26725.1|13111.m23046|protein	NO	007G040400.1.p	NO	AT4G00050	NO
Zm00001d011903	em-PEG	chr8	164256281	164257564	LOC_Os01g71090.1|13101.m07740|protein	NO	003G419400.1.p	NO	AT1G03230	NO
Zm00001d014451	em-PEG	chr5	47928633	47933975	LOC_Os06g46670.2|13106.m04934|protein	NO	010G231100.2.p	NO	AT1G05200	NO
Zm00001d017793	em-PEG	chr5	206964939	206969131	LOC_Os02g47880.2|13102.m05405|protein	NO	004G265600.1.p	NO	AT3G27960	NO
Zm00001d019070	em-PEG	chr7	15137146	15138472	LOC_Os07g23900.1|13107.m02356|protein	NO	002G066700.1.p	NO	AT4G19940	NO
Zm00001d019681	em-PEG	chr7	50682569	50688689	LOC_Os01g27940.1|13101.m02900|protein	NO	004G151700.1.p	NO	AT2G26430	NO
Zm00001d022443	em-PEG	chr7	177801636	177803309	LOC_Os03g57830.1|13103.m06344|protein	NO	002G418000.2.p	NO	AT3G56470	NO
Zm00001d028093	em-PEG	chr1	22735266	22740921	LOC_Os03g10640.1|13103.m01194|protein	NO	001G464900.1.p	NO	AT4G37640	NO
Zm00001d029149	em-PEG	chr1	60531179	60535397	LOC_Os03g22770.1|13103.m02746|protein	NO	001G372700.1.p	NO	AT2G47890	NO
Zm00001d029349	em-PEG	chr1	66851917	66852891	LOC_Os03g26490.1|13103.m03103|protein	NO	001G354800.1.p	NO	NO	NO
Zm00001d032651	em-PEG	chr1	233132459	233135497	LOC_Os10g34480.1|13110.m03070|protein	NO	001G213300.1.p	NO	AT5G23190	NO
Zm00001d032693	em-PEG	chr1	234748713	234750035	LOC_Os10g33820.1|13110.m02993|protein	NO	001G218800.2.p	NO	AT2G37035	NO
Zm00001d033048	em-PEG	chr1	248467942	248474649	LOC_Os10g25290.1|13110.m02129|protein	NO	001G259300.1.p	PEG	AT1G19180	NO
Zm00001d034413	em-PEG	chr1	292247305	292249329	LOC_Os03g57960.1|13103.m06364|protein	NO	001G059800.1.p	NO	AT3G22640	NO
Zm00001d037498	em-PEG	chr6	127318662	127321705	LOC_Os05g07720.1|13105.m00847|protein	NO	009G060100.3.p	NO	AT4G24670	NO
Zm00001d043814	em-PEG	chr3	210939307	210942900	LOC_Os01g49340.1|13101.m05130|protein	NO	003G261300.1.p	NO	AT3G48120	NO
Zm00001d047121	em-PEG	chr9	119272820	119283179	LOC_Os12g07950.1|13112.m00833|protein	NO	008G058100.6.p	NO	AT5G09230	NO
Zm00001d048547	em-PEG	chr9	158517739	158519168	LOC_Os01g24980.1|13101.m02647|protein	NO	001G542600.1.p	NO	AT1G17020	NO
Zm00001d052457	em-PEG	chr4	190405622	190411632	LOC_Os12g04220.1|13112.m00400|protein	NO	005G028400.1.p	NO	AT3G57330	NO
Zm00001d052468	em-PEG	chr4	190667383	190670787	LOC_Os12g04410.1|13112.m00421|protein	NO	008G012600.1.p	NO	AT2G41370	NO
Zm00001d002856	en-MEG	chr2	24825537	24826490	LOC_Os04g44820.2|13104.m11847|protein	NO	006G157500.1.p	NO	AT4G03510	NO
Zm00001d003578	en-MEG	chr2	48812144	48818283	LOC_Os10g10730.1|13110.m00967|protein	NO	001G229850.1.p	NO	AT3G51700	NO
Zm00001d004401	en-MEG	chr2	109327004	109328229	LOC_Os08g13440.2|13108.m01437|protein	NO	006G018100.1.p	NO	AT3G05950	NO
Zm00001d005154	en-MEG	chr2	161423330	161427064	LOC_Os05g04950.2|13105.m00509|protein	NO	002G112000.2.p	NO	AT1G03365	NO
Zm00001d005917	en-MEG	chr2	192687906	192692019	LOC_Os09g28850.3|13109.m02847|protein	NO	002G229700.2.p	NO	AT4G37080	NO
Zm00001d006055	en-MEG	chr2	196661880	196666379	LOC_Os09g32300.3|13109.m03216|protein	NO	002G253600.3.p	MEG	AT1G51580	NO
Zm00001d007228	en-MEG	chr2	225207322	225209334	LOC_Os07g49310.1|13107.m05297|protein	NO	002G430100.1.p	NO	AT5G05580	NO
Zm00001d007389	en-MEG	chr2	230475201	230477149	LOC_Os04g39530.1|13104.m03833|protein	NO	009G197700.2.p	NO	AT3G10820	NO
Zm00001d007652	en-MEG	chr2	236954507	236959237	LOC_Os08g41710.1|13108.m04482|protein	PEG	005G198400.1.p	NO	AT3G07220	NO
Zm00001d007655	en-MEG	chr2	237052725	237059681	LOC_Os09g14680.1|13109.m01374|protein	NO	002G167500.2.p	NO	AT1G06240	NO
Zm00001d011366	en-MEG	chr8	148702797	148711327	LOC_Os01g43150.1|13101.m04449|protein	NO	003G222900.1.p	NO	AT5G53170	NO
Zm00001d011640	en-MEG	chr8	157209018	157210495	LOC_Os01g61880.2|13101.m06611|protein	NO	003G347520.1.p	NO	AT5G07390	NO
Zm00001d012030	en-MEG	chr8	166780698	166784066	LOC_Os01g69110.1|13101.m07545|protein	NO	003G404300.1.p	NO	AT3G27100	NO
Zm00001d012475	en-MEG	chr8	175178145	175184442	LOC_Os01g61210.1|13101.m06514|protein	NO	003G342000.3.p	NO	AT2G40330	NO
Zm00001d012532	en-MEG	chr8	176203820	176207127	LOC_Os01g59900.1|13101.m06370|protein	NO	003G333400.1.p	NO	AT2G37480	NO
Zm00001d012984	en-MEG	chr5	2827981	2833133	LOC_Os03g60360.1|13103.m06622|protein	NO	001G038100.1.p	NO	AT3G14750	NO
Zm00001d013052	en-MEG	chr5	3881567	3886173	LOC_Os03g58920.2|13103.m13033|protein	NO	001G050500.1.p	NO	AT5G62620	NO
Zm00001d013598	en-MEG	chr5	15104859	15105955	LOC_Os03g46180.1|13103.m04968|protein	NO	001G144700.1.p	NO	AT2G48130	NO
Zm00001d013746	en-MEG	chr5	19171913	19174748	LOC_Os12g39160.1|13112.m04050|protein	NO	001G170500.1.p	NO	AT3G19540	NO
Zm00001d014110	en-MEG	chr5	32818181	32819837	LOC_Os10g30890.1|13110.m02670|protein	NO	001G233800.2.p	NO	AT4G24150	NO
Zm00001d014727	en-MEG	chr5	60848776	60852682	LOC_Os06g49440.1|13106.m05289|protein	NO	010G257300.6.p	NO	AT3G02410	NO
Zm00001d016394	en-MEG	chr5	160678198	160679517	LOC_Os02g19200.1|13102.m02147|protein	NO	004G090300.1.p	NO	AT5G61180	NO
Zm00001d016844	en-MEG	chr5	178232995	178234870	LOC_Os02g27200.1|13102.m02956|protein	NO	006G050800.1.p	NO	AT4G15760	NO
Zm00001d017189	en-MEG	chr5	188331294	188361493	LOC_Os06g05240.1|13106.m00505|protein	NO	010G034000.1.p	NO	AT1G71696	NO
Zm00001d017270	en-MEG	chr5	191243684	191245128	LOC_Os02g41580.1|13102.m04589|protein	NO	004G219900.1.p	NO	AT1G08650	NO
Zm00001d018441	en-MEG	chr5	220902906	220907799	LOC_Os02g56540.1|13102.m06497|protein	NO	004G339500.2.p	NO	AT4G14330	NO
Zm00001d018470	en-MEG	chr5	221357720	221362176	LOC_Os02g57060.1|13102.m06563|protein	NO	004G343500.1.p	NO	AT4G17740	NO
Zm00001d018642	en-MEG	chr7	1465054	1470400	LOC_Os07g40030.1|13107.m04159|protein	NO	002G007300.1.p	NO	AT5G66240	NO
Zm00001d018884	en-MEG	chr7	8344609	8353437	LOC_Os03g57790.1|13103.m06338|protein	NO	002G045300.1.p	NO	AT2G02760	NO
Zm00001d019036	en-MEG	chr7	13729726	13737584	LOC_Os02g04840.1|13102.m00516|protein	NO	004G037900.2.p	NO	AT4G16130	NO
Zm00001d019586	en-MEG	chr7	44685450	44699205	LOC_Os07g27320.1|13107.m02722|protein	NO	002G127400.2.p	NO	AT1G10050	NO
Zm00001d022190	en-MEG	chr7	172341210	172344246	NO	NO	NO	NO	NO	NO
Zm00001d022627	en-MEG	chr7	181717982	181720096	LOC_Os09g36740.1|13109.m03626|protein	NO	002G279300.1.p	NO	AT3G51280	NO
Zm00001d023226	en-MEG	chr10	832658	846476	LOC_Os11g02090.2|13111.m09185|protein	NO	008G010200.1.p	NO	AT3G56250	NO
Zm00001d023717	en-MEG	chr10	16709998	16713446	LOC_Os05g14940.1|13105.m01571|protein	NO	009G102000.3.p	NO	AT3G42170	NO
Zm00001d024035	en-MEG	chr10	38787097	38794588	NO	NO	NO	NO	NO	NO
Zm00001d024424	en-MEG	chr10	70414238	70420011	LOC_Os08g20020.2|13108.m02087|protein	NO	007G060000.1.p	NO	AT2G25290	NO
Zm00001d024813	en-MEG	chr10	89233958	89240358	LOC_Os01g12890.1|13101.m01408|protein	MEG	009G039800.1.p	NO	AT5G11530	NO
Zm00001d024876	en-MEG	chr10	91818586	91820109	LOC_Os11g07280.2|13111.m00760|protein	NO	001G189100.1.p	NO	AT4G31490	NO
Zm00001d025887	en-MEG	chr10	133094068	133097996	LOC_Os04g44320.1|13104.m04416|protein	NO	006G152600.1.p	NO	AT1G65730	NO
Zm00001d026618	en-MEG	chr10	149045202	149048903	LOC_Os04g58100.1|13104.m06094|protein	NO	006G267100.2.p	NO	AT5G23390	NO
Zm00001d027320	en-MEG	chr1	2878535	2889452	LOC_Os08g12780.4|13108.m01361|protein	NO	001G537001.1.p	NO	AT4G31040	NO
Zm00001d027616	en-MEG	chr1	9108126	9111252	LOC_Os10g32850.1|13110.m19363|protein	NO	001G509100.1.p	NO	AT4G28690	NO
Zm00001d028164	en-MEG	chr1	24946609	24951403	LOC_Os03g09940.1|13103.m01104|protein	NO	001G470800.1.p	NO	AT5G10180	NO
Zm00001d028601	en-MEG	chr1	40428759	40431019	LOC_Os03g16670.1|13103.m01979|protein	NO	001G422100.1.p	NO	AT5G02230	NO
Zm00001d028615	en-MEG	chr1	40886065	40889048	LOC_Os03g16760.1|13103.m01993|protein	NO	001G421000.1.p	NO	AT1G07630	NO
Zm00001d028866	en-MEG	chr1	48956482	48959493	LOC_Os03g19200.1|13103.m02294|protein	NO	001G397700.1.p	NO	AT4G02100	NO
Zm00001d029042	en-MEG	chr1	55793069	55793605	LOC_Os05g10280.1|13105.m01103|protein	NO	NO	NO	AT3G53240	NO
Zm00001d029185	en-MEG	chr1	61532067	61532456	LOC_Os04g31484.1|13104.m03007|protein	NO	008G137300.1.p	NO	AT4G14010	NO
Zm00001d030305	en-MEG	chr1	121211811	121213196	LOC_Os10g05750.1|13110.m00497|protein	MEG	001G266300.1.p	NO	AT4G38770	NO
Zm00001d031554	en-MEG	chr1	194112919	194119847	LOC_Os08g41270.1|13108.m04429|protein	NO	007G198300.1.p	NO	AT1G65580	NO
Zm00001d031620	en-MEG	chr1	196372442	196380539	LOC_Os08g41950.2|13108.m04509|protein	NO	007G193300.1.p	NO	AT1G24260	NO
Zm00001d031667	en-MEG	chr1	198119172	198130785	LOC_Os08g42530.1|13108.m04583|protein	NO	007G189100.1.p	NO	AT5G13300	NO
Zm00001d031956	en-MEG	chr1	207955044	207958736	LOC_Os08g44380.2|13108.m04813|protein	NO	007G169600.1.p	NO	AT1G08360	NO
Zm00001d032999	en-MEG	chr1	246355067	246357254	LOC_Os03g07360.1|13103.m00819|protein	NO	001G252800.1.p	NO	AT5G39660	NO
Zm00001d033346	en-MEG	chr1	259822653	259823963	LOC_Os12g07970.3|13112.m00838|protein	NO	001G169100.4.p	NO	AT5G44370	NO
Zm00001d034443	en-MEG	chr1	293098082	293102502	LOC_Os07g08340.1|13107.m00824|protein	NO	001G057200.1.p	NO	AT3G22960	NO
Zm00001d035229	en-MEG	chr6	15530206	15536423	LOC_Os09g01290.1|13109.m00036|protein	NO	001G262900.1.p	NO	AT3G07930	NO
Zm00001d035285	en-MEG	chr6	19340069	19371142	LOC_Os12g32986.1|13112.m03364|protein	NO	008G111600.1.p	NO	AT3G07770	NO
Zm00001d036833	en-MEG	chr6	103277557	103280497	LOC_Os11g01836.1|13111.m00099|protein	NO	008G009000.1.p	NO	AT3G08820	NO
Zm00001d037529	en-MEG	chr6	128190263	128195748	LOC_Os01g73480.1|13101.m08017|protein	NO	009G056900.1.p	NO	AT1G05380	NO
Zm00001d037576	en-MEG	chr6	130116712	130119868	LOC_Os05g06480.1|13105.m00694|protein	NO	009G052400.1.p	NO	AT1G15690	NO
Zm00001d039324	en-MEG	chr3	1876337	1877401	LOC_Os01g12440.1|13101.m01343|protein	NO	003G012800.1.p	NO	AT4G23750	NO
Zm00001d039435	en-MEG	chr3	4161898	4175012	LOC_Os01g10530.2|13101.m14998|protein	NO	003G026900.2.p	NO	AT3G58770	NO
Zm00001d039848	en-MEG	chr3	16535244	16539074	LOC_Os01g05840.2|13101.m00569|protein	NO	003G070600.3.p	NO	AT2G37540	NO
Zm00001d040560	en-MEG	chr3	49802802	49805909	LOC_Os02g01350.1|13102.m00053|protein	NO	002G005000.1.p	NO	AT4G28200	NO
Zm00001d041277	en-MEG	chr3	109762671	109768864	LOC_Os12g42610.1|13112.m04479|protein	NO	008G176300.1.p	NO	AT1G08465	NO
Zm00001d041323	en-MEG	chr3	112350290	112355140	LOC_Os12g42160.1|13112.m04426|protein	NO	008G171900.1.p	NO	AT1G72250	NO
Zm00001d041887	en-MEG	chr3	142423558	142424800	LOC_Os07g33360.1|13107.m03390|protein	NO	001G252200.5.p	NO	AT3G16730	NO
Zm00001d041962	en-MEG	chr3	145905008	145908254	LOC_Os01g74000.1|13101.m08084|protein	NO	003G443400.1.p	NO	AT5G40610	NO
Zm00001d043690	en-MEG	chr3	207534871	207537259	LOC_Os02g55870.1|13102.m06414|protein	NO	004G333600.1.p	NO	AT5G34940	NO
Zm00001d043716	en-MEG	chr3	208170221	208174121	LOC_Os02g09930.1|13102.m01095|protein	NO	002G139900.1.p	NO	AT5G03760	NO
Zm00001d044953	en-MEG	chr9	8154859	8155761	LOC_Os06g10710.1|13106.m01160|protein	NO	010G079800.1.p	NO	AT1G66420	NO
Zm00001d045470	en-MEG	chr9	23397355	23399439	LOC_Os06g04070.1|13106.m00354|protein	NO	010G021800.1.p	MEG	AT4G34710	NO
Zm00001d046210	en-MEG	chr9	72063250	72066048	LOC_Os09g33680.1|13109.m03354|protein	NO	010G170300.1.p	NO	AT1G02850	NO
Zm00001d046357	en-MEG	chr9	83801694	83806040	LOC_Os06g37560.1|13106.m03889|protein	NO	010G173800.1.p	NO	AT3G13750	NO
Zm00001d046422	en-MEG	chr9	88938385	88941121	LOC_Os06g39880.1|13106.m04139|protein	NO	010G182966.1.p	NO	AT2G26710	NO
Zm00001d046889	en-MEG	chr9	108887959	108896845	LOC_Os06g45020.1|13106.m04734|protein	NO	010G217400.2.p	NO	AT4G22130	NO
Zm00001d047020	en-MEG	chr9	115522400	115533199	LOC_Os10g42420.1|13110.m03985|protein	NO	001G287800.1.p	NO	AT4G17890	NO
Zm00001d047301	en-MEG	chr9	126055946	126065572	LOC_Os10g36760.1|13110.m03335|protein	NO	001G196700.1.p	NO	AT4G36195	NO
Zm00001d048114	en-MEG	chr9	150383718	150390329	LOC_Os03g60400.1|13103.m06626|protein	NO	002G008900.1.p	NO	AT5G02960	NO
Zm00001d048702	en-MEG	chr4	3574390	3576530	LOC_Os08g01450.1|13108.m00065|protein	NO	007G003600.1.p	NO	AT5G57260	NO
Zm00001d048847	en-MEG	chr4	6292792	6293595	NO	NO	005G184800.1.p	NO	NO	NO
Zm00001d049608	en-MEG	chr4	37421922	37427789	LOC_Os08g04270.3|13108.m00403|protein	NO	007G032500.1.p	NO	AT3G20740	NO
Zm00001d053151	en-MEG	chr4	216317487	216322672	LOC_Os11g06020.1|13111.m00594|protein	NO	005G045200.3.p	NO	AT2G35940	NO
Zm00001d053740	en-MEG	chr4	240122896	240124863	LOC_Os02g08330.1|13102.m00960|protein	NO	004G064900.1.p	NO	AT5G13210	NO
Zm00001d053997	en-MEG	chr4	244821758	244829813	LOC_Os02g04230.3|13102.m00430|protein	NO	004G032800.4.p	NO	AT3G18040	NO
Zm00001d001780	en-PEG	chr2	709269	717277	LOC_Os04g58750.4|13104.m06183|protein	NO	006G273200.1.p	NO	AT1G63500	NO
Zm00001d002024	en-PEG	chr2	4593403	4606170	LOC_Os04g55960.1|13104.m05813|protein	NO	006G245400.1.p	PEG	AT4G30210	NO
Zm00001d002104	en-PEG	chr2	5993672	5998425	LOC_Os04g55050.1|13104.m05702|protein	NO	006G237100.1.p	NO	AT3G25660	NO
Zm00001d002659	en-PEG	chr2	18564412	18572241	LOC_Os04g47690.3|13104.m04838|protein	NO	006G179800.1.p	NO	AT1G20696	NO
Zm00001d002961	en-PEG	chr2	28154594	28157878	LOC_Os02g54000.1|13102.m06177|protein	NO	006G154100.2.p	NO	AT3G52210	NO
Zm00001d003395	en-PEG	chr2	42789053	42794069	LOC_Os04g38950.1|13104.m03757|protein	NO	006G109100.1.p	NO	AT5G57890	NO
Zm00001d003644	en-PEG	chr2	51528732	51562581	LOC_Os02g53520.1|13102.m06114|protein	NO	006G084300.1.p	NO	AT1G21730	NO
Zm00001d004130	en-PEG	chr2	85362121	85368441	NO	NO	006G031000.1.p	PEG	NO	NO
Zm00001d004740	en-PEG	chr2	135147704	135154431	LOC_Os11g07910.1|13111.m00826|protein	PEG	005G062200.1.p	NO	AT1G10950	NO
Zm00001d004925	en-PEG	chr2	149182642	149191037	LOC_Os11g05130.2|13111.m00485|protein	NO	005G034700.1.p	NO	AT5G35210	NO
Zm00001d005199	en-PEG	chr2	163239951	163244821	LOC_Os10g35450.1|13110.m03182|protein	NO	002G082100.1.p	NO	AT2G42960	NO
Zm00001d007496	en-PEG	chr2	233248411	233252981	LOC_Os11g36340.1|13111.m03556|protein	NO	005G159600.1.p	NO	AT2G35880	NO
Zm00001d007596	en-PEG	chr2	235925333	235926658	LOC_Os11g38980.4|13111.m03838|protein	NO	005G178100.4.p	NO	AT1G14330	NO
Zm00001d010716	en-PEG	chr8	125524850	125538429	LOC_Os01g56800.3|13101.m06023|protein	NO	009G191000.2.p	PEG	AT5G43560	NO
Zm00001d011091	en-PEG	chr8	138660037	138672465	LOC_Os05g01700.1|13105.m00113|protein	NO	009G005400.1.p	NO	AT4G39850	NO
Zm00001d011111	en-PEG	chr8	139303508	139306189	LOC_Os05g01210.2|13105.m00037|protein	NO	009G001100.1.p	NO	AT1G68490	NO
Zm00001d011352	en-PEG	chr8	147819974	147824314	LOC_Os01g42960.1|13101.m04424|protein	NO	003G220500.1.p	NO	AT1G53300	NO
Zm00001d011427	en-PEG	chr8	150235940	150246330	LOC_Os12g05920.1|13112.m00601|protein	NO	003G229500.7.p	NO	AT5G47430	NO
Zm00001d011478	en-PEG	chr8	151704998	151707238	LOC_Os12g08230.1|13112.m00867|protein	NO	003G239800.2.p	NO	AT1G48170	NO
Zm00001d011560	en-PEG	chr8	154457261	154486289	LOC_Os01g48170.1|13101.m04988|protein	NO	003G252100.1.p	NO	AT5G44180	NO
Zm00001d011802	en-PEG	chr8	161757825	161764087	LOC_Os01g73460.1|13101.m08015|protein	NO	003G439700.1.p	NO	AT5G09790	NO
Zm00001d011803	en-PEG	chr8	161769734	161773104	LOC_Os01g73450.1|13101.m08014|protein	NO	003G439600.1.p	PEG	AT3G18680	NO
Zm00001d012640	en-PEG	chr8	177653401	177663257	LOC_Os01g56820.2|13101.m06026|protein	NO	003G314100.1.p	NO	AT1G06060	NO
Zm00001d012958	en-PEG	chr5	2364388	2370531	LOC_Os03g60710.1|13103.m06666|protein	NO	001G033400.1.p	NO	AT2G28930	NO
Zm00001d012993	en-PEG	chr5	2874875	2878453	LOC_Os03g60130.2|13103.m06600|protein	NO	001G039700.1.p	NO	AT2G38560	NO
Zm00001d013065	en-PEG	chr5	4123406	4128589	LOC_Os03g58480.1|13103.m06420|protein	NO	001G054700.1.p	NO	AT3G23090	NO
Zm00001d014640	en-PEG	chr5	56924834	56942751	LOC_Os04g46450.1|13104.m04677|protein	NO	010G247800.1.p	NO	AT2G44950	NO
Zm00001d014773	en-PEG	chr5	62639884	62646464	LOC_Os06g50030.1|13106.m05373|protein	NO	010G264400.1.p	NO	AT2G46700	NO
Zm00001d015209	en-PEG	chr5	79498782	79511605	LOC_Os02g04490.1|13102.m00470|protein	NO	004G034900.1.p	NO	AT3G12980	NO
Zm00001d015231	en-PEG	chr5	80210099	80215267	LOC_Os02g04670.1|13102.m00491|protein	NO	004G036800.2.p	NO	AT5G58090	NO
Zm00001d017525	en-PEG	chr5	198706889	198720905	LOC_Os02g44642.1|13102.m04995|protein	NO	004G288600.1.p	NO	AT1G63700	NO
Zm00001d017700	en-PEG	chr5	204553720	204562336	LOC_Os10g42690.1|13110.m04015|protein	NO	004G273100.1.p	NO	AT5G46910	NO
Zm00001d017826	en-PEG	chr5	207860764	207865964	LOC_Os08g40180.1|13108.m04294|protein	NO	004G262100.1.p	PEG	AT1G76490	NO
Zm00001d018472	en-PEG	chr5	221369297	221375425	LOC_Os02g57080.2|13102.m06566|protein	PEG	004G343700.1.p	NO	AT2G20300	NO
Zm00001d018665	en-PEG	chr7	2114939	2117113	LOC_Os03g54900.2|13103.m05963|protein	NO	002G009900.1.p	NO	AT3G02130	NO
Zm00001d018828	en-PEG	chr7	6673483	6680117	LOC_Os07g06610.1|13107.m00631|protein	NO	002G039200.1.p	NO	AT5G22030	NO
Zm00001d018902	en-PEG	chr7	8758340	8762850	LOC_Os07g07550.1|13107.m00740|protein	NO	002G047500.1.p	NO	AT5G18200	NO
Zm00001d018976	en-PEG	chr7	11454051	11464836	LOC_Os07g08500.1|13107.m00843|protein	NO	002G056000.1.p	NO	AT5G49160	NO
Zm00001d018986	en-PEG	chr7	12037670	12043615	LOC_Os07g08790.1|13107.m00873|protein	NO	002G056900.1.p	NO	AT1G54460	NO
Zm00001d019070	en-PEG	chr7	15137146	15138472	LOC_Os07g23900.1|13107.m02356|protein	NO	002G066700.1.p	NO	AT4G19940	NO
Zm00001d019215	en-PEG	chr7	22120424	22126437	LOC_Os07g12490.1|13107.m01289|protein	PEG	002G081100.1.p	NO	AT2G38610	NO
Zm00001d019342	en-PEG	chr7	28745288	28767439	LOC_Os05g01230.1|13105.m00040|protein	NO	002G101200.2.p	NO	AT1G57820	PEG
Zm00001d019363	en-PEG	chr7	29849024	29858068	LOC_Os07g17360.2|13107.m01821|protein	NO	002G105200.4.p	PEG	AT1G13460	NO
Zm00001d020420	en-PEG	chr7	112910144	112922494	LOC_Os09g24210.1|13109.m02296|protein	NO	002G197200.1.p	NO	AT3G50590	NO
Zm00001d020769	en-PEG	chr7	131678626	131700543	LOC_Os09g28940.1|13109.m02863|protein	PEG	002G230400.3.p	PEG	AT5G65450	NO
Zm00001d021201	en-PEG	chr7	145827021	145831069	LOC_Os09g34960.1|13109.m03468|protein	NO	002G268700.1.p	NO	AT4G11820	NO
Zm00001d021611	en-PEG	chr7	158049839	158052734	LOC_Os03g17730.1|13103.m02120|protein	NO	001G410000.1.p	NO	AT1G11790	NO
Zm00001d022166	en-PEG	chr7	171503608	171509248	LOC_Os07g42770.1|13107.m04480|protein	NO	002G377300.1.p	NO	AT3G50530	NO
Zm00001d022168	en-PEG	chr7	171557933	171559261	LOC_Os07g42800.1|13107.m04483|protein	NO	002G377800.1.p	NO	AT5G64360	NO
Zm00001d022212	en-PEG	chr7	172912597	172915949	LOC_Os07g43430.1|13107.m04565|protein	NO	002G384200.2.p	NO	AT5G04885	NO
Zm00001d022443	en-PEG	chr7	177801636	177803309	LOC_Os03g57830.1|13103.m06344|protein	NO	002G418000.2.p	NO	AT3G56470	NO
Zm00001d022494	en-PEG	chr7	178744244	178745200	LOC_Os07g47240.1|13107.m05020|protein	NO	002G409300.2.p	NO	AT5G07500	NO
Zm00001d023706	en-PEG	chr10	16400383	16407915	LOC_Os11g10070.1|13111.m01066|protein	NO	008G063000.1.p	NO	AT1G43850	NO
Zm00001d024520	en-PEG	chr10	75862661	75864082	LOC_Os08g06510.1|13108.m00665|protein	NO	003G148000.3.p	NO	AT3G58030	NO
Zm00001d024722	en-PEG	chr10	85123160	85131753	LOC_Os05g04150.2|13105.m00409|protein	NO	009G031200.2.p	NO	AT4G01960	NO
Zm00001d024824	en-PEG	chr10	89687263	89690813	LOC_Os05g05310.2|13105.m00551|protein	NO	009G041700.2.p	NO	AT3G24440	NO
Zm00001d025300	en-PEG	chr10	113290809	113298776	LOC_Os04g32880.5|13104.m11890|protein	PEG	006G061100.3.p	NO	AT1G09020	NO
Zm00001d025359	en-PEG	chr10	115505590	115511924	LOC_Os04g33780.1|13104.m03273|protein	NO	006G073200.2.p	PEG	AT2G27350	NO
Zm00001d025412	en-PEG	chr10	117864859	117874556	LOC_Os04g35060.1|13104.m03408|protein	NO	006G080900.1.p	PEG	AT2G23420	NO
Zm00001d025679	en-PEG	chr10	126089661	126095930	LOC_Os02g57270.2|13102.m06591|protein	NO	006G118700.1.p	NO	AT1G70590	NO
Zm00001d026487	en-PEG	chr10	146895594	146903010	LOC_Os04g56140.2|13104.m05835|protein	NO	006G246900.1.p	NO	AT4G31430	NO
Zm00001d026532	en-PEG	chr10	147796659	147804756	LOC_Os04g56720.1|13104.m05913|protein	NO	006G254300.1.p	NO	AT1G19880	NO
Zm00001d027334	en-PEG	chr1	3124648	3135817	LOC_Os10g36810.1|13110.m03342|protein	NO	001G534700.1.p	PEG	AT3G51120	NO
Zm00001d027373	en-PEG	chr1	3960300	3964921	LOC_Os03g02680.2|13103.m00235|protein	NO	001G530600.1.p	NO	AT3G48750	NO
Zm00001d028733	en-PEG	chr1	44554395	44560803	LOC_Os08g37800.1|13108.m03989|protein	NO	001G408200.6.p	NO	AT3G01090	NO
Zm00001d028960	en-PEG	chr1	52938630	52945326	LOC_Os03g20530.1|13103.m02462|protein	NO	001G389100.1.p	NO	AT2G27090	NO
Zm00001d029217	en-PEG	chr1	62743193	62743990	LOC_Os04g33820.1|13104.m03279|protein	NO	001G366600.4.p	NO	AT2G27310	NO
Zm00001d029714	en-PEG	chr1	83647801	83656803	LOC_Os10g38850.1|13110.m03538|protein	NO	001G316700.1.p	NO	AT4G16310	NO
Zm00001d030868	en-PEG	chr1	164196407	164205410	LOC_Os12g39420.9|13112.m04081|protein	NO	008G145800.4.p	NO	AT2G26510	NO
Zm00001d030916	en-PEG	chr1	167088410	167093959	LOC_Os12g40190.1|13112.m04177|protein	NO	008G150000.1.p	NO	AT2G23460	NO
Zm00001d031002	en-PEG	chr1	172832218	172839410	LOC_Os12g41190.1|13112.m04295|protein	NO	008G160000.1.p	PEG	AT1G04190	NO
Zm00001d031602	en-PEG	chr1	195958619	195965889	LOC_Os08g41790.1|13108.m04490|protein	NO	007G194700.1.p	NO	AT3G27190	NO
Zm00001d031961	en-PEG	chr1	208050358	208053463	NO	NO	NO	NO	AT1G23020	NO
Zm00001d032148	en-PEG	chr1	214491081	214496190	LOC_Os09g25460.1|13109.m02436|protein	NO	007G142100.1.p	NO	AT5G48930	NO
Zm00001d032361	en-PEG	chr1	223971687	223976147	LOC_Os03g44010.2|13103.m04738|protein	NO	007G106800.1.p	NO	AT5G12230	NO
Zm00001d032398	en-PEG	chr1	225366813	225370301	LOC_Os03g36760.2|13103.m04013|protein	NO	008G017900.1.p	NO	AT1G32120	MEG
Zm00001d033048	en-PEG	chr1	248467942	248474649	LOC_Os10g25290.1|13110.m02129|protein	NO	001G259300.1.p	PEG	AT1G19180	NO
Zm00001d033104	en-PEG	chr1	250291343	250304767	LOC_Os03g38970.1|13103.m04231|protein	PEG	001G178600.2.p	NO	AT3G62010	NO
Zm00001d033265	en-PEG	chr1	256498470	256500905	LOC_Os01g63680.1|13101.m06832|protein	NO	001G158600.2.p	PEG	AT5G11050	NO
Zm00001d033405	en-PEG	chr1	262089165	262094227	LOC_Os03g46910.1|13103.m05051|protein	NO	001G140700.2.p	NO	AT3G22960	NO
Zm00001d034004	en-PEG	chr1	280899968	280910431	LOC_Os03g53630.1|13103.m05858|protein	NO	001G090800.1.p	NO	AT5G36740	NO
Zm00001d034705	en-PEG	chr1	300345623	300345976	LOC_Os03g61090.1|13103.m06714|protein	NO	001G029600.1.p	NO	AT3G47070	NO
Zm00001d034832	en-PEG	chr1	303279392	303289233	LOC_Os03g62850.2|13103.m06961|protein	NO	001G014900.2.p	NO	AT3G23790	NO
Zm00001d036215	en-PEG	chr6	77510982	77515737	LOC_Os06g06090.1|13106.m00618|protein	NO	010G043200.1.p	NO	AT2G43790	NO
Zm00001d036507	en-PEG	chr6	90881545	90893674	LOC_Os04g46450.1|13104.m04677|protein	NO	010G247800.1.p	NO	AT2G44950	NO
Zm00001d036648	en-PEG	chr6	96210403	96211140	LOC_Os02g07450.2|13102.m00847|protein	NO	010G221400.1.p	NO	AT1G56170	NO
Zm00001d036829	en-PEG	chr6	103042150	103048591	LOC_Os06g40730.1|13106.m04244|protein	NO	010G189000.1.p	NO	AT4G17150	NO
Zm00001d036878	en-PEG	chr6	105491864	105498540	LOC_Os06g40450.3|13106.m04206|protein	NO	010G186500.2.p	NO	AT5G24300	NO
Zm00001d037498	en-PEG	chr6	127318662	127321705	LOC_Os05g07720.1|13105.m00847|protein	NO	009G060100.3.p	NO	AT4G24670	NO
Zm00001d037700	en-PEG	chr6	134419542	134425842	LOC_Os01g08560.2|13101.m00897|protein	NO	009G067000.1.p	NO	AT1G79930	NO
Zm00001d038217	en-PEG	chr6	151823509	151834751	LOC_Os05g34760.1|13105.m03621|protein	NO	009G141700.2.p	NO	AT1G24160	NO
Zm00001d038655	en-PEG	chr6	161921883	161936270	LOC_Os05g43280.1|13105.m04555|protein	NO	009G191000.2.p	PEG	AT5G43560	NO
Zm00001d038849	en-PEG	chr6	165819453	165832524	LOC_Os05g46210.1|13105.m04921|protein	NO	009G213300.1.p	NO	AT3G47590	NO
Zm00001d039265	en-PEG	chr3	822132	826368	LOC_Os01g13550.1|13101.m01489|protein	NO	003G003450.1.p	NO	AT3G23920	NO
Zm00001d039369	en-PEG	chr3	2681579	2690651	LOC_Os01g11590.2|13101.m01244|protein	NO	003G019000.1.p	NO	AT1G06240	NO
Zm00001d039965	en-PEG	chr3	20882799	20892393	LOC_Os01g04260.1|13101.m00384|protein	NO	003G083300.1.p	NO	AT3G02580	NO
Zm00001d041708	en-PEG	chr3	134378935	134385716	LOC_Os12g34330.1|13112.m03500|protein	NO	008G113100.1.p	NO	AT3G08020	NO
Zm00001d042256	en-PEG	chr3	157560975	157565462	LOC_Os01g70410.3|13101.m15111|protein	NO	003G413000.4.p	NO	AT3G26700	NO
Zm00001d042590	en-PEG	chr3	172910308	172914852	LOC_Os01g66300.1|13101.m07179|protein	NO	003G381200.1.p	NO	AT1G09660	NO
Zm00001d042845	en-PEG	chr3	181888810	181892986	LOC_Os01g63250.1|13101.m06787|protein	PEG	003G358300.1.p	PEG	AT3G54130	NO
Zm00001d043218	en-PEG	chr3	192249971	192253626	LOC_Os05g41910.1|13105.m04455|protein	NO	003G323300.1.p	NO	AT1G50660	NO
Zm00001d043540	en-PEG	chr3	203318250	203330249	LOC_Os03g08400.1|13103.m00965|protein	NO	004G230300.1.p	NO	AT5G08020	NO
Zm00001d043914	en-PEG	chr3	213715142	213721168	LOC_Os01g48180.1|13101.m04989|protein	NO	003G252200.3.p	NO	AT1G28420	NO
Zm00001d043953	en-PEG	chr3	214751851	214757049	LOC_Os01g47540.1|13101.m04913|protein	NO	003G248200.2.p	PEG	AT5G46410	NO
Zm00001d044386	en-PEG	chr3	226651710	226654418	LOC_Os02g29150.2|13102.m03174|protein	PEG	003G207800.1.p	NO	AT1G13570	NO
Zm00001d044479	en-PEG	chr3	229347693	229352050	LOC_Os01g42960.1|13101.m04424|protein	NO	003G220500.1.p	NO	AT1G53300	NO
Zm00001d045109	en-PEG	chr9	13084842	13106200	LOC_Os06g08480.1|13106.m00885|protein	NO	010G065300.1.p	NO	AT2G25170	NO
Zm00001d045215	en-PEG	chr9	16402965	16423791	LOC_Os06g06870.1|13106.m00711|protein	PEG	010G051400.1.p	NO	AT5G41580	NO
Zm00001d045310	en-PEG	chr9	18782254	18788548	LOC_Os06g06090.1|13106.m00618|protein	NO	010G043200.1.p	NO	AT2G43790	NO
Zm00001d045387	en-PEG	chr9	20378245	20382973	LOC_Os06g05130.1|13106.m00491|protein	NO	010G033300.1.p	NO	AT1G08510	NO
Zm00001d045505	en-PEG	chr9	24930065	24935418	LOC_Os06g03760.2|13106.m00316|protein	NO	010G017800.1.p	NO	AT5G01460	NO
Zm00001d046218	en-PEG	chr9	72602369	72613367	LOC_Os06g36740.1|13106.m03801|protein	NO	010G169700.2.p	NO	AT5G56750	NO
Zm00001d046534	en-PEG	chr9	94413654	94418069	LOC_Os06g40490.1|13106.m04211|protein	PEG	010G186700.3.p	NO	AT2G26600	NO
Zm00001d047020	en-PEG	chr9	115522400	115533199	LOC_Os10g42420.1|13110.m03985|protein	NO	001G287800.1.p	NO	AT4G17890	NO
Zm00001d047776	en-PEG	chr9	141481416	141488213	LOC_Os03g17210.1|13103.m02056|protein	NO	001G414900.1.p	PEG	AT3G53540	NO
Zm00001d047780	en-PEG	chr9	141567592	141575710	LOC_Os03g17180.1|13103.m02054|protein	NO	001G415300.1.p	NO	AT3G55320	NO
Zm00001d048085	en-PEG	chr9	149821917	149824839	LOC_Os03g11550.2|13103.m12944|protein	PEG	001G456400.1.p	NO	AT1G13740	NO
Zm00001d048497	en-PEG	chr9	157237558	157241000	LOC_Os03g02680.2|13103.m00235|protein	NO	001G530600.1.p	NO	AT3G48750	NO
Zm00001d048904	en-PEG	chr4	7506778	7507584	LOC_Os09g03810.1|13109.m00304|protein	NO	005G176800.2.p	NO	NO	NO
Zm00001d049648	en-PEG	chr4	38697693	38701745	LOC_Os08g02670.1|13108.m00211|protein	NO	007G023600.1.p	PEG	AT4G24790	NO
Zm00001d049809	en-PEG	chr4	45664408	45668447	LOC_Os08g41700.1|13108.m04481|protein	NO	007G195600.1.p	NO	AT3G07210	NO
Zm00001d049928	en-PEG	chr4	53483182	53499946	LOC_Os08g44560.1|13108.m04846|protein	NO	007G167500.2.p	NO	AT3G45750	NO
Zm00001d050810	en-PEG	chr4	124187282	124193089	LOC_Os02g35500.1|13102.m03858|protein	NO	004G182500.1.p	NO	AT3G25530	NO
Zm00001d050907	en-PEG	chr4	129650946	129657013	LOC_Os02g37020.1|13102.m04052|protein	NO	004G192900.1.p	NO	AT1G19010	NO
Zm00001d051404	en-PEG	chr4	157204494	157214368	LOC_Os02g44642.1|13102.m04995|protein	NO	004G288600.1.p	NO	AT1G63700	NO
Zm00001d052436	en-PEG	chr4	190062610	190072524	LOC_Os05g33210.2|13105.m03430|protein	NO	003G131400.1.p	NO	AT3G52730	NO
Zm00001d052928	en-PEG	chr4	205227775	205231894	LOC_Os11g36340.1|13111.m03556|protein	NO	005G159600.1.p	NO	AT2G35880	NO
Zm00001d053648	en-PEG	chr4	238153226	238159523	LOC_Os02g10650.1|13102.m01187|protein	NO	004G083000.1.p	NO	AT1G55840	NO

## Sheet: Supplemental Table S3
Supplemental Table S3. Clusters of imprinted genes detected in the maize genome based on our results.
	cluster bed			gene bed			gene ID
Embryo	chr4	6292792	6334007	chr4	6292792	6293595	Zm00001d048847
	chr4	6292792	6334007	chr4	6333303	6334007	Zm00001d048848
Endosperm	chr8	161757825	161773104	chr8	161757825	161764087	Zm00001d011802
	chr8	161757825	161773104	chr8	161769734	161773104	Zm00001d011803

## Sheet: Supplemental Table S4
Supplemental Table S4. Conservation summary of B73-added and Mo17-added imprinted genes.
Gene_ID	Conservation in maize	Best hit in rice	Type in rice	Best hit in sorghum	Type in sorghum	Best hit in Arabidopsis	Type in Arabidopsis
Zm00001d024813	B73-added non-conserved genes	LOC_Os01g12890	MEG	009G039800	NO	AT5G11530	NO
Zm00001d030305	B73-added non-conserved genes	LOC_Os10g05750	MEG	001G266300	NO	AT4G38770	NO
Zm00001d032398	B73-added non-conserved genes	LOC_Os03g36760	NO	008G017900	NO	AT1G32120	MEG
Zm00001d020769	B73-added non-conserved genes	LOC_Os09g28940	PEG	002G230400	PEG	AT5G65450	NO
Zm00001d011900	B73-added non-conserved genes	LOC_Os01g71200	NO	003G420100	NO	AT4G03110	MEG
Zm00001d006055	B73-added conserved genes	LOC_Os09g32300	NO	002G253600	MEG	AT1G51580	NO
Zm00001d007652	B73-added conserved genes	LOC_Os08g41710	PEG	005G198400	NO	AT3G07220	NO
Zm00001d002024	B73-added conserved genes	LOC_Os04g55960	NO	006G245400	PEG	AT4G30210	NO
Zm00001d004130	B73-added conserved genes	NO	NO	006G031000	PEG	NO	NO
Zm00001d004740	B73-added conserved genes	LOC_Os11g07910	PEG	005G062200	NO	AT1G10950	NO
Zm00001d019215	B73-added conserved genes	LOC_Os07g12490	PEG	002G081100	NO	AT2G38610	NO
Zm00001d019342	B73-added conserved genes	LOC_Os05g01230	NO	002G101200	NO	AT1G57820	PEG
Zm00001d019363	B73-added conserved genes	LOC_Os07g17360	NO	002G105200	PEG	AT1G13460	NO
Zm00001d020769	B73-added conserved genes	LOC_Os09g28940	PEG	002G230400	PEG	AT5G65450	NO
Zm00001d025359	B73-added conserved genes	LOC_Os04g33780	NO	006G073200	PEG	AT2G27350	NO
Zm00001d027334	B73-added conserved genes	LOC_Os10g36810	NO	001G534700	PEG	AT3G51120	NO
Zm00001d031002	B73-added conserved genes	LOC_Os12g41190	NO	008G160000	PEG	AT1G04190	NO
Zm00001d033048	B73-added conserved genes	LOC_Os10g25290	NO	001G259300	PEG	AT1G19180	NO
Zm00001d033104	B73-added conserved genes	LOC_Os03g38970	PEG	001G178600	NO	AT3G62010	NO
Zm00001d033265	B73-added conserved genes	LOC_Os01g63680	NO	001G158600	PEG	AT5G11050	NO
Zm00001d038655	B73-added conserved genes	LOC_Os05g43280	NO	009G191000	PEG	AT5G43560	NO
Zm00001d042845	B73-added conserved genes	LOC_Os01g63250	PEG	003G358300	PEG	AT3G54130	NO
Zm00001d043953	B73-added conserved genes	LOC_Os01g47540	NO	003G248200	PEG	AT5G46410	NO
Zm00001d044386	B73-added conserved genes	LOC_Os02g29150	PEG	003G207800	NO	AT1G13570	NO
Zm00001d045215	B73-added conserved genes	LOC_Os06g06870	PEG	010G051400	NO	AT5G41580	NO
Zm00001d046534	B73-added conserved genes	LOC_Os06g40490	PEG	010G186700	NO	AT2G26600	NO
Zm00001d047776	B73-added conserved genes	LOC_Os03g17210	NO	001G414900	PEG	AT3G53540	NO
Zm00001d048085	B73-added conserved genes	LOC_Os03g11550	PEG	001G456400	NO	AT1G13740	NO
Zm00001d049648	B73-added conserved genes	LOC_Os08g02670	NO	007G023600	PEG	AT4G24790	NO
Zm00001d007652	B73-added conserved genes	LOC_Os08g41710	PEG	005G198400	NO	AT3G07220	NO
Zm00001d002024	B73-added conserved genes	LOC_Os04g55960	NO	006G245400	PEG	AT4G30210	NO
Zm00001d004130	B73-added conserved genes	NO	NO	006G031000	PEG	NO	NO
Zm00001d004740	B73-added conserved genes	LOC_Os11g07910	PEG	005G062200	NO	AT1G10950	NO
Zm00001d017826	B73-added conserved genes	LOC_Os08g40180	NO	004G262100	PEG	AT1G76490	NO
Zm00001d019215	B73-added conserved genes	LOC_Os07g12490	PEG	002G081100	NO	AT2G38610	NO
Zm00001d019342	B73-added conserved genes	LOC_Os05g01230	NO	002G101200	NO	AT1G57820	PEG
Zm00001d019363	B73-added conserved genes	LOC_Os07g17360	NO	002G105200	PEG	AT1G13460	NO
Zm00001d020769	B73-added conserved genes	LOC_Os09g28940	PEG	002G230400	PEG	AT5G65450	NO
Zm00001d025300	B73-added conserved genes	LOC_Os04g32880	PEG	006G061100	NO	AT1G09020	NO
Zm00001d025359	B73-added conserved genes	LOC_Os04g33780	NO	006G073200	PEG	AT2G27350	NO
Zm00001d027334	B73-added conserved genes	LOC_Os10g36810	NO	001G534700	PEG	AT3G51120	NO
Zm00001d031002	B73-added conserved genes	LOC_Os12g41190	NO	008G160000	PEG	AT1G04190	NO
Zm00001d033048	B73-added conserved genes	LOC_Os10g25290	NO	001G259300	PEG	AT1G19180	NO
Zm00001d033104	B73-added conserved genes	LOC_Os03g38970	PEG	001G178600	NO	AT3G62010	NO
Zm00001d033265	B73-added conserved genes	LOC_Os01g63680	NO	001G158600	PEG	AT5G11050	NO
Zm00001d038655	B73-added conserved genes	LOC_Os05g43280	NO	009G191000	PEG	AT5G43560	NO
Zm00001d042845	B73-added conserved genes	LOC_Os01g63250	PEG	003G358300	PEG	AT3G54130	NO
Zm00001d043953	B73-added conserved genes	LOC_Os01g47540	NO	003G248200	PEG	AT5G46410	NO
Zm00001d044386	B73-added conserved genes	LOC_Os02g29150	PEG	003G207800	NO	AT1G13570	NO
Zm00001d045215	B73-added conserved genes	LOC_Os06g06870	PEG	010G051400	NO	AT5G41580	NO
Zm00001d046534	B73-added conserved genes	LOC_Os06g40490	PEG	010G186700	NO	AT2G26600	NO
Zm00001d047776	B73-added conserved genes	LOC_Os03g17210	NO	001G414900	PEG	AT3G53540	NO
Zm00001d048085	B73-added conserved genes	LOC_Os03g11550	PEG	001G456400	NO	AT1G13740	NO
Zm00001d049648	B73-added conserved genes	LOC_Os08g02670	NO	007G023600	PEG	AT4G24790	NO
Zm00001d030305	Mo17-added non-conserved genes	LOC_Os10g05750	MEG	001G266300	NO	AT4G38770	NO
Zm00001d032398	Mo17-added non-conserved genes	LOC_Os03g36760	NO	008G017900	NO	AT1G32120	NO
Zm00001d048085	Mo17-added non-conserved genes	LOC_Os03g11550	PEG	001G456400	NO	AT1G13740	NO
Zm00001d003677	Mo17-added non-conserved genes	LOC_Os04g35010	NO	006G080500	MEG	AT1G49770	NO
Zm00001d020769	Mo17-added non-conserved genes	LOC_Os09g28940	PEG	002G230400	PEG	AT5G65450	NO
Zm00001d011900	Mo17-added non-conserved genes	LOC_Os01g71200	NO	003G420100	NO	AT4G03110	NO
Zm00001d006055	Mo17-added conserved genes	LOC_Os09g32300	NO	002G253600	MEG	AT1G51580	NO
Zm00001d007652	Mo17-added conserved genes	LOC_Os08g41710	PEG	005G198400	NO	AT3G07220	NO
Zm00001d024813	Mo17-added conserved genes	LOC_Os01g12890	MEG	009G039800	NO	AT5G11530	NO
Zm00001d002024	Mo17-added conserved genes	LOC_Os04g55960	NO	006G245400	PEG	AT4G30210	NO
Zm00001d004130	Mo17-added conserved genes	NO	NO	006G031000	PEG	NO	NO
Zm00001d010716	Mo17-added conserved genes	LOC_Os01g56800	NO	009G191000	PEG	AT5G43560	NO
Zm00001d011803	Mo17-added conserved genes	LOC_Os01g73450	NO	003G439600	PEG	AT3G18680	NO
Zm00001d018472	Mo17-added conserved genes	LOC_Os02g57080	PEG	004G343700	NO	AT2G20300	NO
Zm00001d019215	Mo17-added conserved genes	LOC_Os07g12490	PEG	002G081100	NO	AT2G38610	NO
Zm00001d019342	Mo17-added conserved genes	LOC_Os05g01230	NO	002G101200	NO	AT1G57820	PEG
Zm00001d019363	Mo17-added conserved genes	LOC_Os07g17360	NO	002G105200	PEG	AT1G13460	NO
Zm00001d020769	Mo17-added conserved genes	LOC_Os09g28940	PEG	002G230400	PEG	AT5G65450	NO
Zm00001d025359	Mo17-added conserved genes	LOC_Os04g33780	NO	006G073200	PEG	AT2G27350	NO
Zm00001d027334	Mo17-added conserved genes	LOC_Os10g36810	NO	001G534700	PEG	AT3G51120	NO
Zm00001d031002	Mo17-added conserved genes	LOC_Os12g41190	NO	008G160000	PEG	AT1G04190	NO
Zm00001d033048	Mo17-added conserved genes	LOC_Os10g25290	NO	001G259300	PEG	AT1G19180	NO
Zm00001d033104	Mo17-added conserved genes	LOC_Os03g38970	PEG	001G178600	NO	AT3G62010	NO
Zm00001d033265	Mo17-added conserved genes	LOC_Os01g63680	NO	001G158600	PEG	AT5G11050	NO
Zm00001d038655	Mo17-added conserved genes	LOC_Os05g43280	NO	009G191000	PEG	AT5G43560	NO
Zm00001d042845	Mo17-added conserved genes	LOC_Os01g63250	PEG	003G358300	PEG	AT3G54130	NO
Zm00001d043953	Mo17-added conserved genes	LOC_Os01g47540	NO	003G248200	PEG	AT5G46410	NO
Zm00001d044386	Mo17-added conserved genes	LOC_Os02g29150	PEG	003G207800	NO	AT1G13570	NO
Zm00001d045215	Mo17-added conserved genes	LOC_Os06g06870	PEG	010G051400	NO	AT5G41580	NO
Zm00001d046534	Mo17-added conserved genes	LOC_Os06g40490	PEG	010G186700	NO	AT2G26600	NO
Zm00001d047776	Mo17-added conserved genes	LOC_Os03g17210	NO	001G414900	PEG	AT3G53540	NO
Zm00001d049648	Mo17-added conserved genes	LOC_Os08g02670	NO	007G023600	PEG	AT4G24790	NO
Zm00001d007652	Mo17-added conserved genes	LOC_Os08g41710	PEG	005G198400	NO	AT3G07220	NO
Zm00001d024813	Mo17-added conserved genes	LOC_Os01g12890	MEG	009G039800	NO	AT5G11530	NO
Zm00001d002024	Mo17-added conserved genes	LOC_Os04g55960	NO	006G245400	PEG	AT4G30210	NO
Zm00001d004130	Mo17-added conserved genes	NO	NO	006G031000	PEG	NO	NO
Zm00001d010716	Mo17-added conserved genes	LOC_Os01g56800	NO	009G191000	PEG	AT5G43560	NO
Zm00001d011803	Mo17-added conserved genes	LOC_Os01g73450	NO	003G439600	PEG	AT3G18680	NO
Zm00001d017826	Mo17-added conserved genes	LOC_Os08g40180	NO	004G262100	PEG	AT1G76490	NO
Zm00001d019215	Mo17-added conserved genes	LOC_Os07g12490	PEG	002G081100	NO	AT2G38610	NO
Zm00001d019342	Mo17-added conserved genes	LOC_Os05g01230	NO	002G101200	NO	AT1G57820	PEG
Zm00001d019363	Mo17-added conserved genes	LOC_Os07g17360	NO	002G105200	PEG	AT1G13460	NO
Zm00001d020769	Mo17-added conserved genes	LOC_Os09g28940	PEG	002G230400	PEG	AT5G65450	NO
Zm00001d025300	Mo17-added conserved genes	LOC_Os04g32880	PEG	006G061100	NO	AT1G09020	NO
Zm00001d025359	Mo17-added conserved genes	LOC_Os04g33780	NO	006G073200	PEG	AT2G27350	NO
Zm00001d027334	Mo17-added conserved genes	LOC_Os10g36810	NO	001G534700	PEG	AT3G51120	NO
Zm00001d031002	Mo17-added conserved genes	LOC_Os12g41190	NO	008G160000	PEG	AT1G04190	NO
Zm00001d033048	Mo17-added conserved genes	LOC_Os10g25290	NO	001G259300	PEG	AT1G19180	NO
Zm00001d033104	Mo17-added conserved genes	LOC_Os03g38970	PEG	001G178600	NO	AT3G62010	NO
Zm00001d033265	Mo17-added conserved genes	LOC_Os01g63680	NO	001G158600	PEG	AT5G11050	NO
Zm00001d038655	Mo17-added conserved genes	LOC_Os05g43280	NO	009G191000	PEG	AT5G43560	NO
Zm00001d042845	Mo17-added conserved genes	LOC_Os01g63250	PEG	003G358300	PEG	AT3G54130	NO
Zm00001d043953	Mo17-added conserved genes	LOC_Os01g47540	NO	003G248200	PEG	AT5G46410	NO
Zm00001d044386	Mo17-added conserved genes	LOC_Os02g29150	PEG	003G207800	NO	AT1G13570	NO
Zm00001d045215	Mo17-added conserved genes	LOC_Os06g06870	PEG	010G051400	NO	AT5G41580	NO
Zm00001d046534	Mo17-added conserved genes	LOC_Os06g40490	PEG	010G186700	NO	AT2G26600	NO
Zm00001d047776	Mo17-added conserved genes	LOC_Os03g17210	NO	001G414900	PEG	AT3G53540	NO
Zm00001d049648	Mo17-added conserved genes	LOC_Os08g02670	NO	007G023600	PEG	AT4G24790	NO

## Sheet: Supplemental Table S5
Supplemental Table S5. Number of cis-elements in each imprinted gene.
	Gene ID	ABRE	ARE	Box_4	CGTCA-motif	ERE	G-box	GT1-motif	LTR	TCA-element	TCT-motif	TGACG-motif	TGA-element	W_box
add B73	Zm00001d013746	3	3	1	8	0	2	1	0	0	0	3	0	0
	Zm00001d024813	6	5	0	2	1	3	0	1	0	0	3	3	0
	Zm00001d030305	6	3	0	2	0	4	2	3	2	1	8	2	1
	Zm00001d047020	3	1	1	0	0	3	1	0	1	1	2	1	1
	Zm00001d048114	3	3	0	3	0	6	1	1	1	0	5	0	1
	Zm00001d048847	5	3	6	4	1	5	2	3	1	0	4	1	0
	Zm00001d011427	1	2	3	3	0	3	0	4	0	1	5	2	2
	Zm00001d011560	6	0	1	1	1	3	1	0	1	0	3	2	0
	Zm00001d025679	2	5	1	5	1	6	0	1	0	0	4	2	0
	Zm00001d032148	4	1	2	4	0	9	1	1	0	2	0	0	3
	Zm00001d032398	2	3	0	4	0	6	3	0	3	1	5	0	0
	Zm00001d043914	3	2	0	4	1	5	0	1	1	0	4	0	1
	Zm00001d003776	3	0	0	5	0	9	1	1	0	1	6	1	0
	Zm00001d006374	5	2	0	7	0	3	2	0	1	1	4	2	1
	Zm00001d015124	4	2	0	3	0	4	0	0	2	2	4	0	1
	Zm00001d018069	3	0	2	6	1	4	1	2	0	2	3	2	2
	Zm00001d020941	1	5	0	4	1	5	2	0	0	0	5	1	0
	Zm00001d024959	2	4	2	2	0	1	0	2	0	0	0	2	0
	Zm00001d026560	8	4	2	5	1	4	1	0	0	1	4	1	1
	Zm00001d030019	1	4	2	1	1	7	0	1	1	2	9	0	0
	Zm00001d031696	2	4	2	3	1	6	1	0	1	1	9	0	1
	Zm00001d041822	5	1	0	6	1	4	0	1	0	1	2	0	1
	Zm00001d043367	5	1	0	4	1	5	4	1	1	2	5	1	0
	Zm00001d050273	3	2	1	4	0	3	1	0	0	1	2	1	0
	Zm00001d020769	3	1	2	0	1	3	0	1	0	1	1	1	1
	Zm00001d022430	2	3	0	3	0	5	1	1	0	2	1	1	0
	Zm00001d040303	3	2	2	5	0	8	1	3	1	1	4	2	2
	Zm00001d002282	8	2	0	9	0	5	1	0	1	0	3	0	0
	Zm00001d003658	1	3	1	5	0	6	0	1	0	1	5	0	1
	Zm00001d012738	2	3	2	2	1	3	0	1	0	0	5	1	0
	Zm00001d026306	7	1	3	2	0	6	2	13	3	1	4	2	2
	Zm00001d031489	5	0	1	5	2	1	2	1	0	3	1	1	2
	Zm00001d032223	6	2	0	3	0	3	0	0	1	0	2	3	3
	Zm00001d032750	3	2	1	4	0	4	1	0	1	0	4	0	0
	Zm00001d034388	7	2	6	4	0	6	1	0	1	0	2	3	1
	Zm00001d039745	5	4	1	1	3	8	0	0	2	5	4	0	1
	Zm00001d045529	3	2	3	2	0	1	1	0	0	2	2	0	4
	Zm00001d046749	4	3	0	5	1	6	0	0	1	1	4	1	0
	Zm00001d046781	2	1	4	2	0	5	0	0	2	1	2	0	1
	Zm00001d006166	3	2	0	3	2	2	0	0	0	2	7	2	0
	Zm00001d011078	5	3	1	9	1	3	2	2	1	1	1	3	2
	Zm00001d011851	4	6	3	1	1	6	0	2	0	0	0	1	0
	Zm00001d011854	1	6	1	4	2	7	0	0	0	2	2	2	0
	Zm00001d011900	5	1	3	4	0	3	0	1	1	2	1	0	1
	Zm00001d025021	6	6	0	2	0	6	1	1	0	1	4	2	0
	Zm00001d032384	2	3	3	0	0	5	0	0	3	0	2	0	0
	Zm00001d045978	2	5	2	2	0	2	1	1	0	0	3	1	2
	Zm00001d047587	4	4	0	1	0	4	1	1	0	2	2	1	4
	Zm00001d047781	8	3	2	2	1	5	1	2	0	0	6	1	0
	Zm00001d047828	5	1	0	3	0	6	2	0	0	0	3	1	5
	Zm00001d047833	7	4	2	4	1	5	1	0	1	2	2	1	1
add Mo17	Zm00001d003578	3	1	0	3	0	8	1	13	0	1	5	2	4
	Zm00001d030305	6	2	2	4	0	4	0	1	1	0	0	2	0
	Zm00001d026532	5	1	9	3	1	3	0	0	0	0	4	1	0
	Zm00001d028733	1	2	2	4	0	5	2	0	0	5	2	0	0
	Zm00001d032148	7	2	1	3	0	7	1	0	1	0	4	0	2
	Zm00001d032398	7	3	3	2	1	5	0	1	2	2	6	0	3
	Zm00001d034705	5	1	0	7	1	4	1	1	0	0	3	1	0
	Zm00001d039369	5	2	1	3	0	4	5	0	2	2	0	0	0
	Zm00001d043914	4	4	3	3	0	5	2	1	0	3	0	4	0
	Zm00001d045109	3	2	2	5	0	5	1	0	1	1	5	2	3
	Zm00001d048085	2	4	1	2	0	5	2	2	0	1	3	1	1
	Zm00001d003677	5	4	3	5	0	4	0	2	0	1	7	2	0
	Zm00001d016604	5	7	1	0	0	5	2	0	1	1	5	3	1
	Zm00001d024659	4	0	0	3	1	1	2	0	1	0	0	1	1
	Zm00001d024959	4	2	3	2	2	4	1	2	0	3	0	1	1
	Zm00001d027616	1	1	2	1	1	6	2	0	0	0	3	2	1
	Zm00001d030347	6	2	2	7	0	6	1	1	0	1	4	1	2
	Zm00001d031993	9	6	2	5	0	2	0	3	1	0	4	1	2
	Zm00001d041822	5	2	0	5	0	10	2	2	0	1	3	0	1
	Zm00001d053113	2	2	2	0	1	7	2	0	0	2	4	3	1
	Zm00001d020769	3	4	0	0	1	2	0	0	1	2	2	1	2
	Zm00001d044136	3	3	1	6	0	6	2	1	0	1	7	0	0
	Zm00001d004707	3	2	2	3	0	7	0	0	1	0	3	0	1
	Zm00001d005325	6	4	2	5	1	3	1	0	0	0	4	0	0
	Zm00001d006243	2	1	1	4	0	5	0	1	0	0	5	1	2
	Zm00001d017214	5	3	1	1	0	3	1	1	3	1	2	1	1
	Zm00001d024588	6	2	1	3	3	6	0	0	1	2	5	1	1
	Zm00001d027610	2	1	3	3	0	5	0	0	1	2	2	4	0
	Zm00001d027611	2	1	2	3	1	4	1	2	0	1	1	1	1
	Zm00001d030556	5	4	1	2	1	6	1	0	0	1	5	0	0
	Zm00001d032750	2	3	2	4	0	1	1	0	2	1	3	0	0
	Zm00001d034419	2	7	1	5	0	2	0	0	2	0	4	2	0
	Zm00001d008177	7	1	2	2	0	4	1	0	0	1	4	1	2
	Zm00001d008203	2	2	2	4	0	6	0	1	3	1	3	0	0
	Zm00001d008262	4	1	1	0	1	1	1	2	0	1	0	0	3
	Zm00001d009850	6	1	0	4	2	2	0	0	0	2	1	1	0
	Zm00001d011078	4	2	1	3	0	3	1	2	1	1	3	1	0
	Zm00001d011900	3	1	1	1	1	6	1	0	1	1	2	0	0
	Zm00001d012702	2	0	0	7	0	3	0	1	1	0	3	1	0
	Zm00001d017379	1	0	2	4	0	4	2	0	1	0	1	2	1
	Zm00001d017787	4	10	4	1	1	7	3	1	1	0	3	0	0
	Zm00001d019162	5	4	1	2	1	5	1	0	1	1	0	3	0
	Zm00001d032250	7	5	6	6	0	8	3	1	1	0	1	3	0
	Zm00001d033580	3	1	0	2	0	6	1	1	0	1	3	0	3
	Zm00001d036573	3	4	1	0	0	7	2	2	0	0	5	1	5
	Zm00001d041993	8	0	0	3	0	2	3	3	0	1	3	3	0
	Zm00001d044823	6	2	1	5	1	7	1	1	0	2	4	1	3
	Zm00001d046978	1	2	1	4	3	3	2	1	2	3	7	1	3
	Zm00001d046995	8	0	1	0	1	3	4	2	0	1	2	0	1
	Zm00001d047781	5	1	1	0	0	5	3	1	0	0	2	1	2
	Zm00001d047828	7	3	1	4	0	7	1	0	1	0	6	2	0

## Sheet: Supplemental Table S6
Supplemental Table S6. Primers used in this experiment.
Primers name	sequence
mu-1049153-F	CAACTCTGGTGCAGTTTATATTTGG
mu-1049153-R	CAACGTGATATATGCAAGCAAC
Tir6-F	AGAGAAGCCAACGCCAWCGCCTCYATTTCGTC
Bar-F	CCATCGTCAACCACTACATCGAGACA
Bar-R	CTTCAGCAGGTGGGTGTAGAGCGT
verification-769F	CCATCCGTTGTTTACCAGTGTAGGC
verification-769R	CGTTAGAACCTGGCATCTCCGA
verification-959-F	AGGATAAAGATTTCATTAAGCGTCA
verification-959-R	AATTTTCCAAAAGCCAGTAGAGC
verification-305-F	GCGGGCTGCTATAAACTATCCAACCA
verification-305-R	TCTTGAACTTCTCAGGGTCCGTCT
verification-148-F	TGGCAGTCCCCAAGACGCACAC
verification-148-R	ATGCCTAATATGTTCTCCCCGCCTA
